# Supplementary material for: Discovery of Novel N-Pyridylpyrazole Thiazole Derivatives as Insecticide Leads
Source: MDPI journal article supplement (doi:10.3390/agronomy12102472), 2022-10-11
Supplement: s1 [file s1]

Archive with 1 entries (1 files):
- agronomy-1931690-supplementary.pdf
