# Supplementary material for: Discovery of Novel N-Pyridylpyrazole Thiazole Derivatives as Insecticide Leads
Source: MDPI journal article supplement (doi:10.3390/agronomy12102472), 2022-10-11
Supplement: s1 [file s1 › agronomy-1931690-supplementary.pdf]

## *Supporting Information*

### **Discovery of Novel *N*-Pyridylpyrazole Thiazole Derivatives as Insecticide Leads**

Shuai Yang, Hongxiang Peng, Jiahong Tang, Shuting Fan, Chen Zhao, Hanhong Xu and Guangkai Yao \*

*Key Laboratory of Natural Pesticide and Chemical Biology, Ministry of Education, South China Agricultural University, Guangzhou, Guangdong 510642, China.*

\*Corresponding authors: Gaungkai Yao (Yao) Email: yaoguangkai111@163.com; Tel: +86-20-85285127;

# <sup>1</sup>H NMR and <sup>13</sup>C NMR spectra (Figure S1–S50)

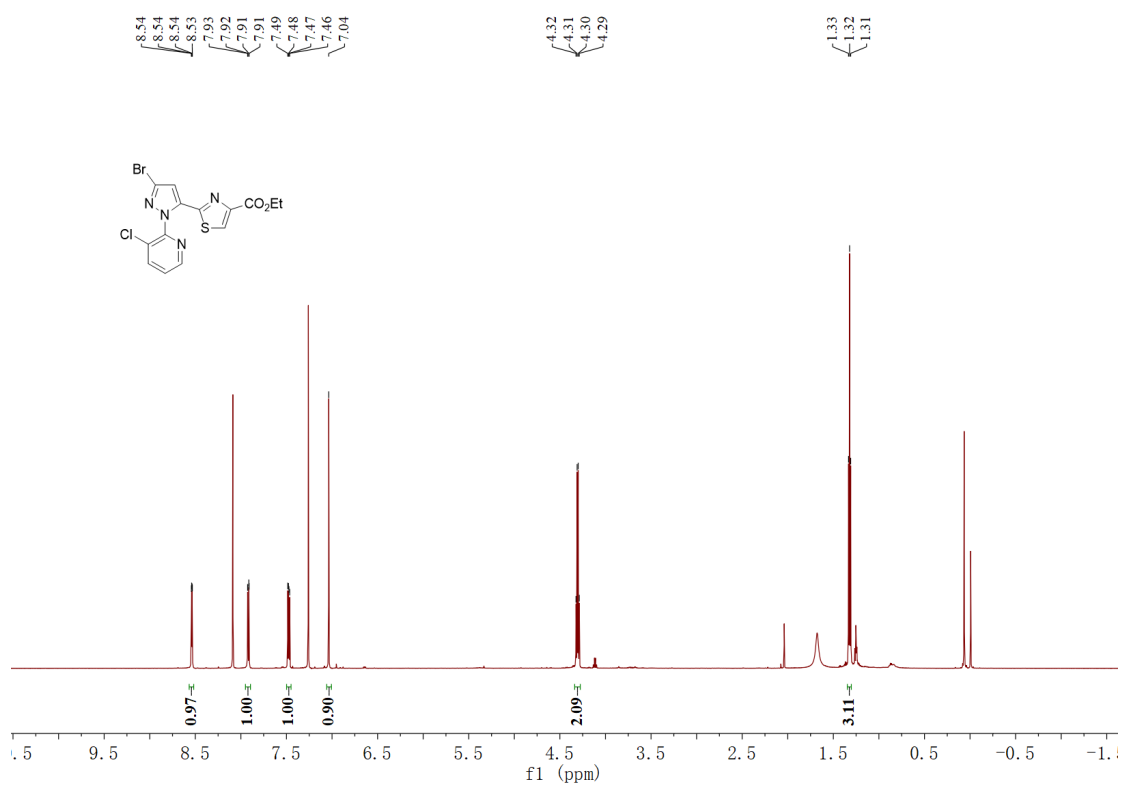

**Figure S1.** <sup>1</sup>H NMR spectrum of Compound 4

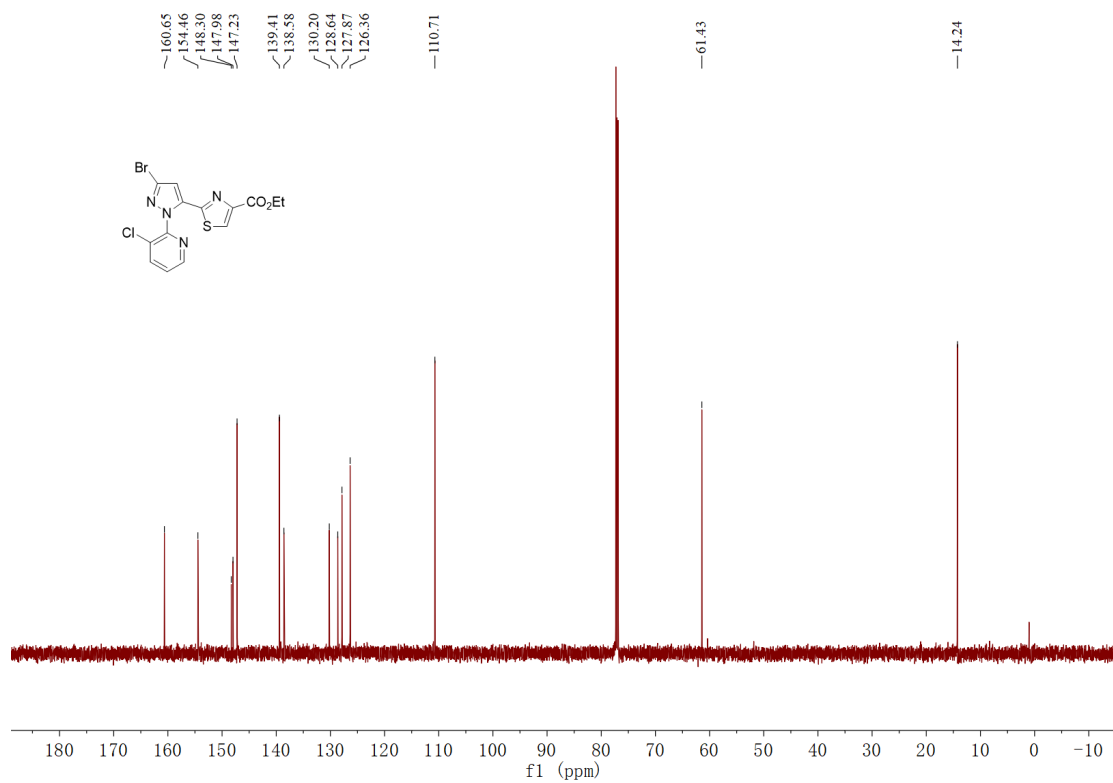

**Figure S2.** <sup>13</sup>C NMR spectrum of Compound 4

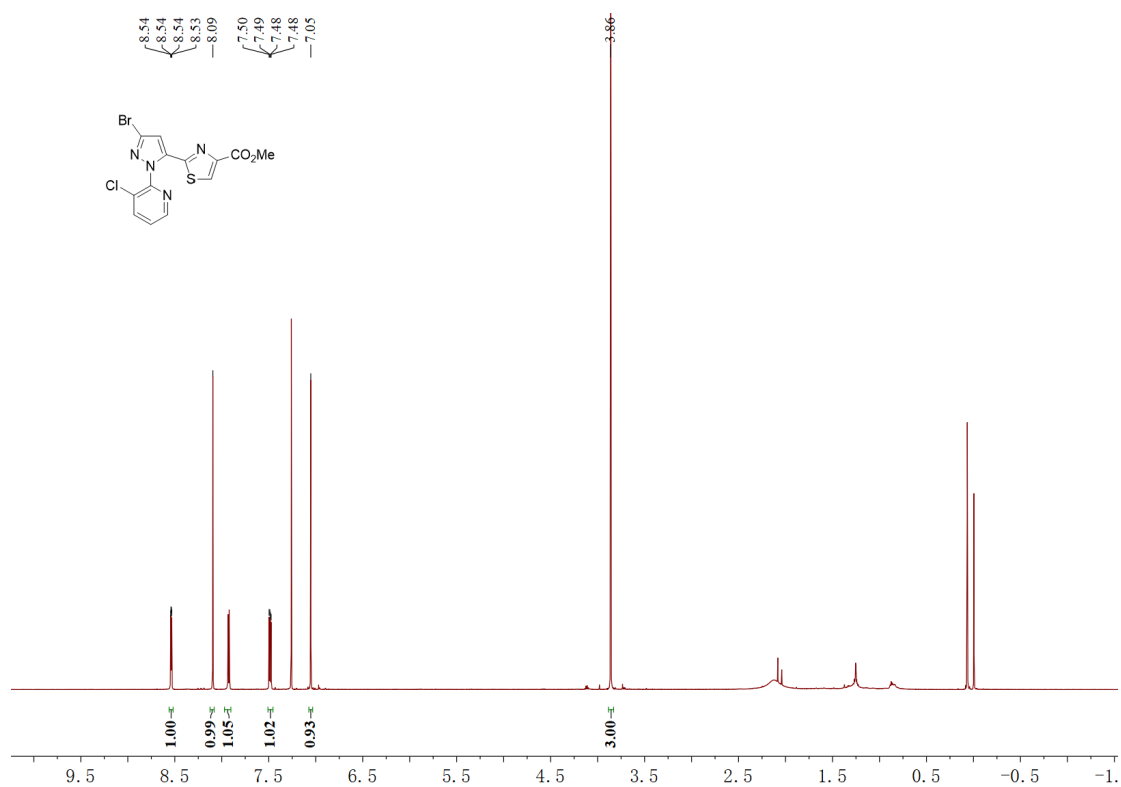

Figure S3. <sup>1</sup>H NMR spectrum of Compound 6a

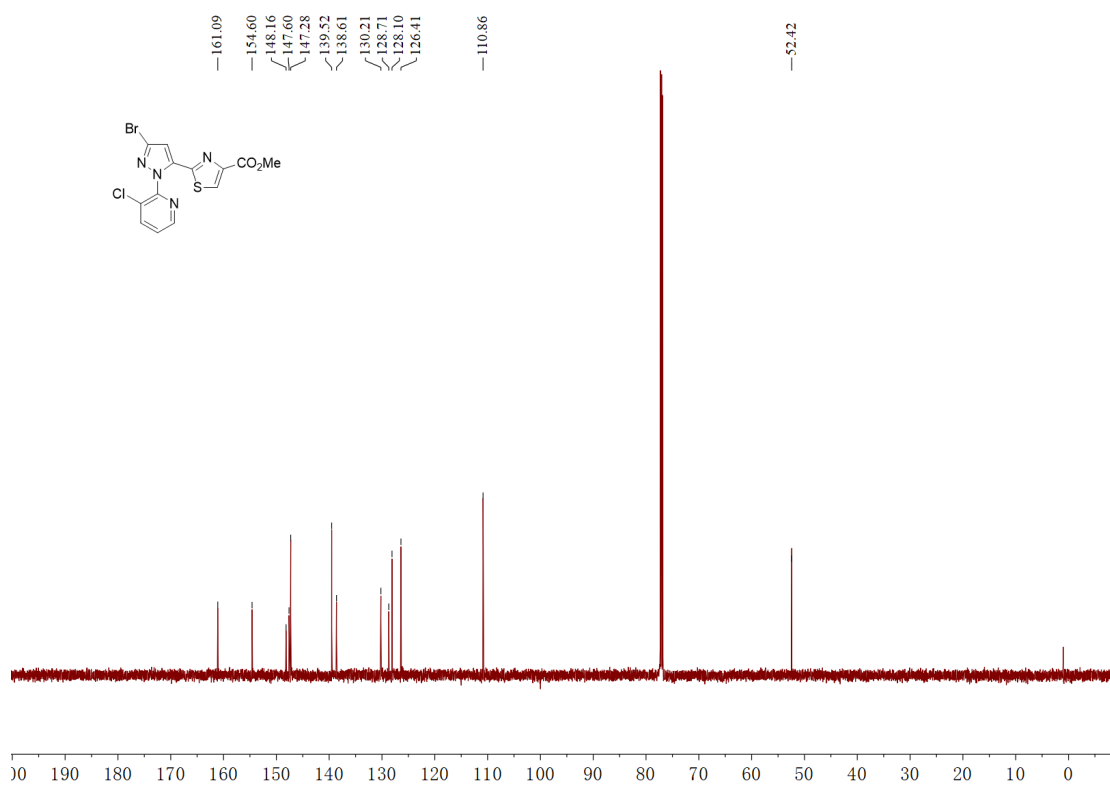

Figure S4. <sup>13</sup>C NMR spectrum of Compound 6a

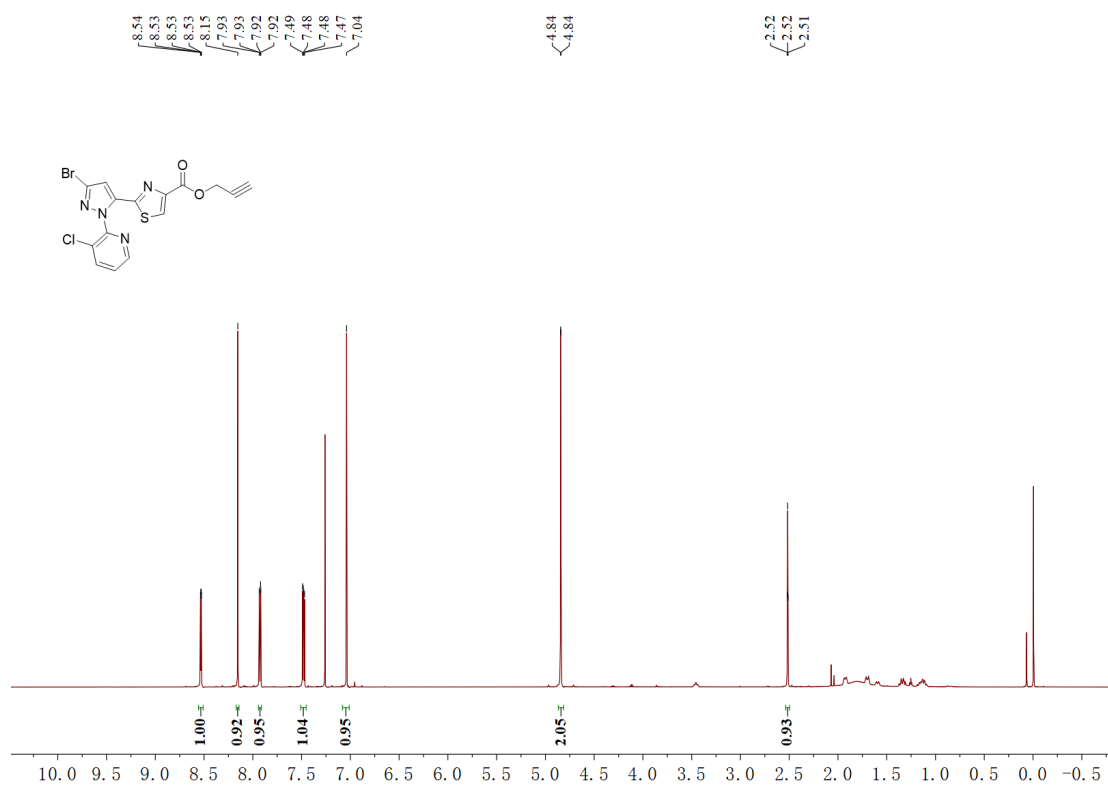

Figure S5. <sup>1</sup>H NMR spectrum of Compound 6b

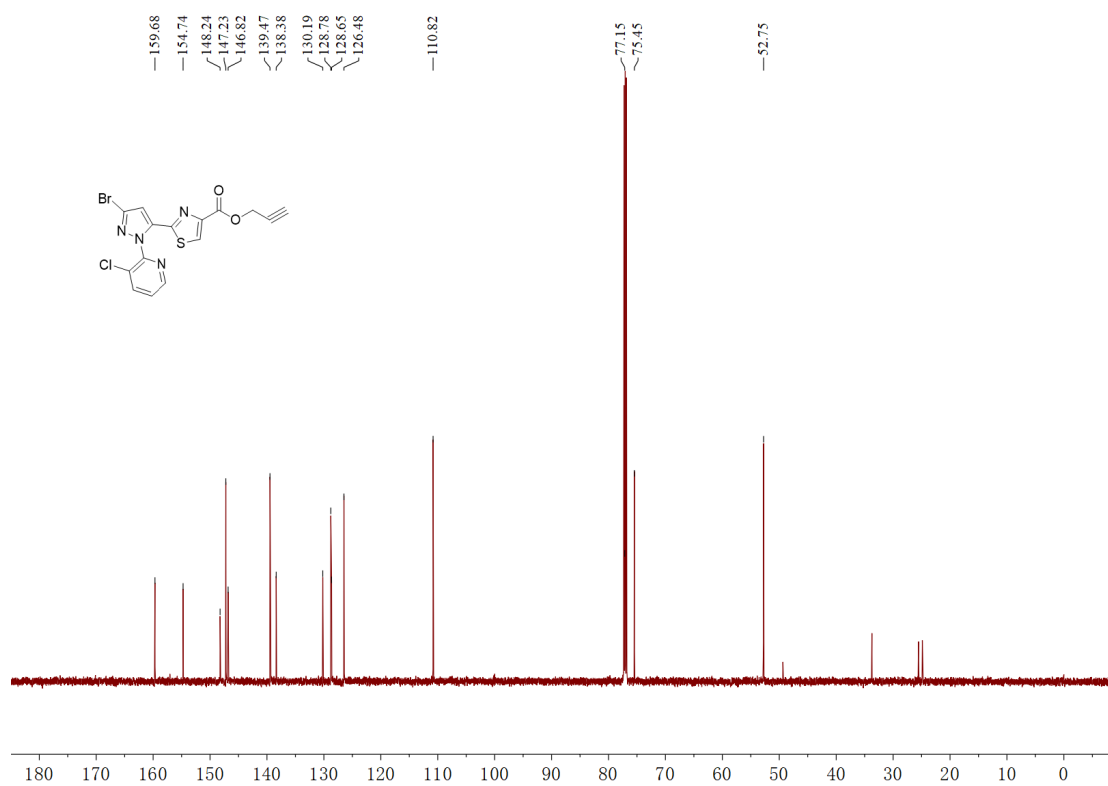

Figure S6. <sup>13</sup>C NMR spectrum of Compound 6b

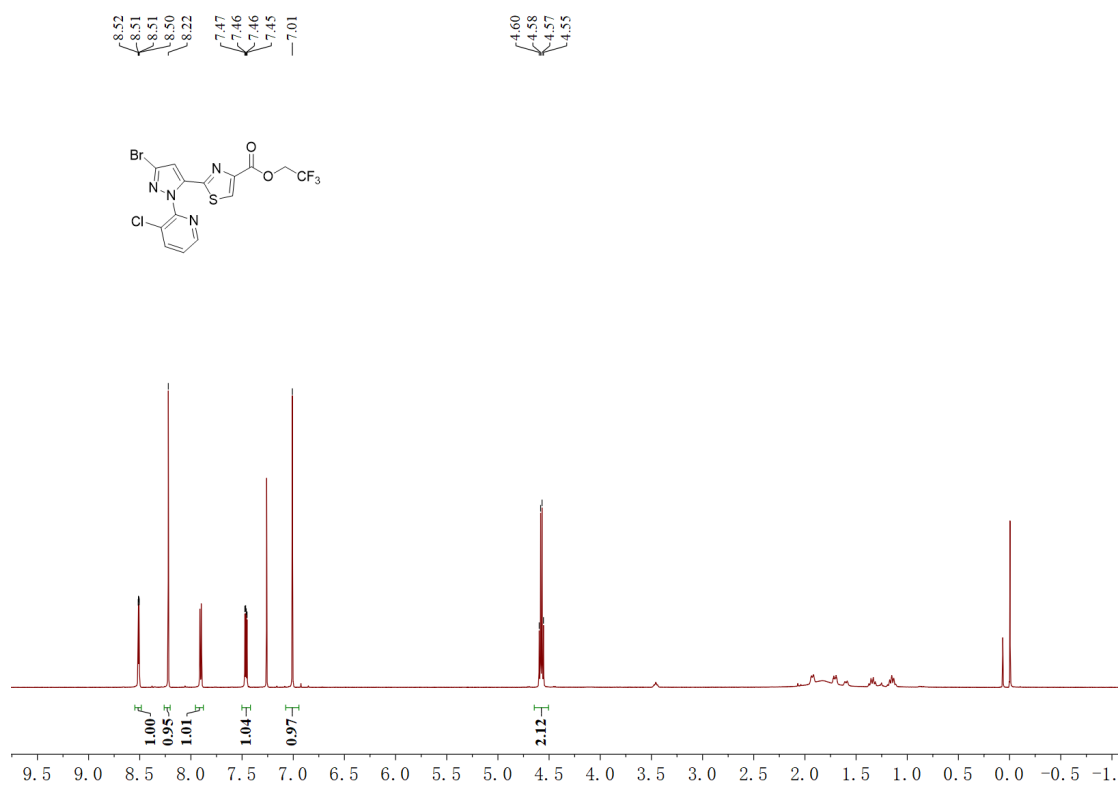

Figure S7. <sup>1</sup>H NMR spectrum of Compound 6c

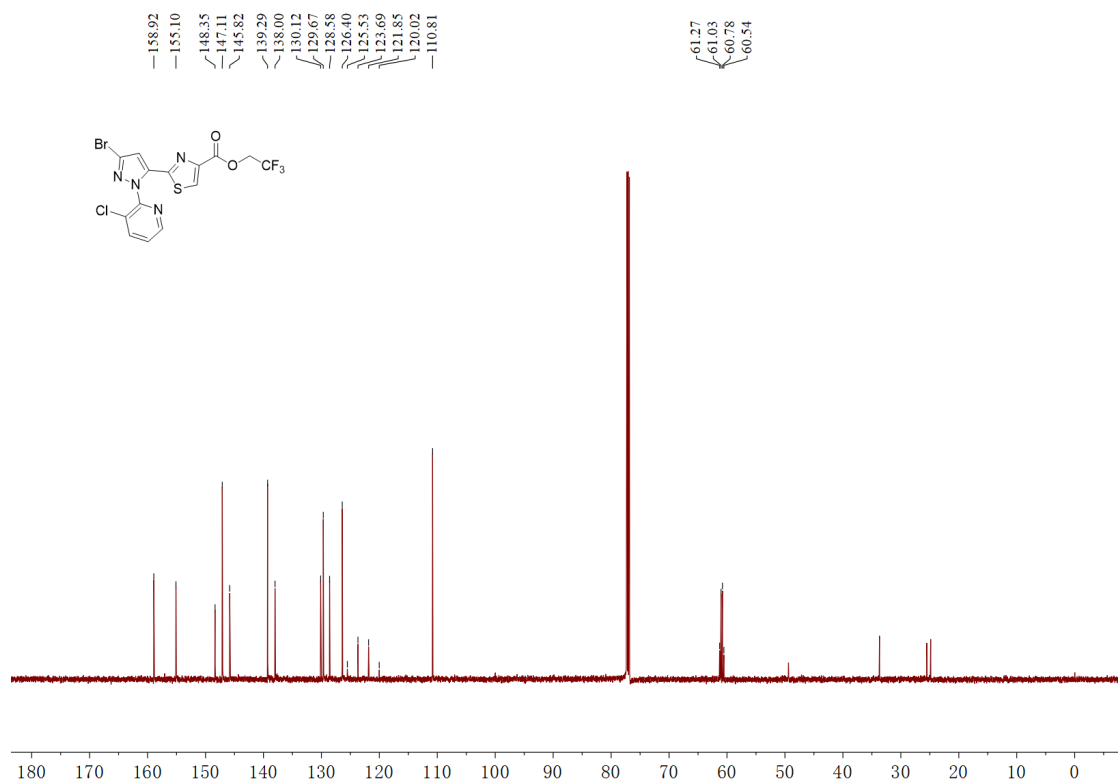

Figure S8. <sup>13</sup>C NMR spectrum of Compound 6c

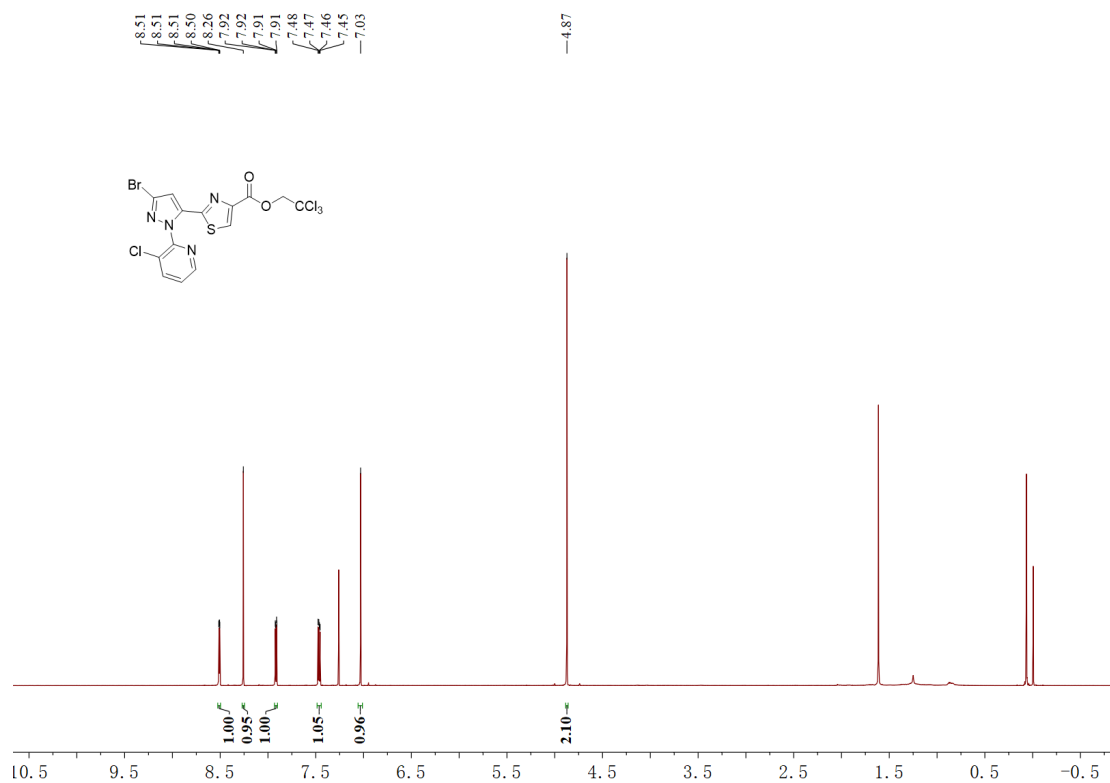

Figure S9. <sup>1</sup>H NMR spectrum of Compound 6d

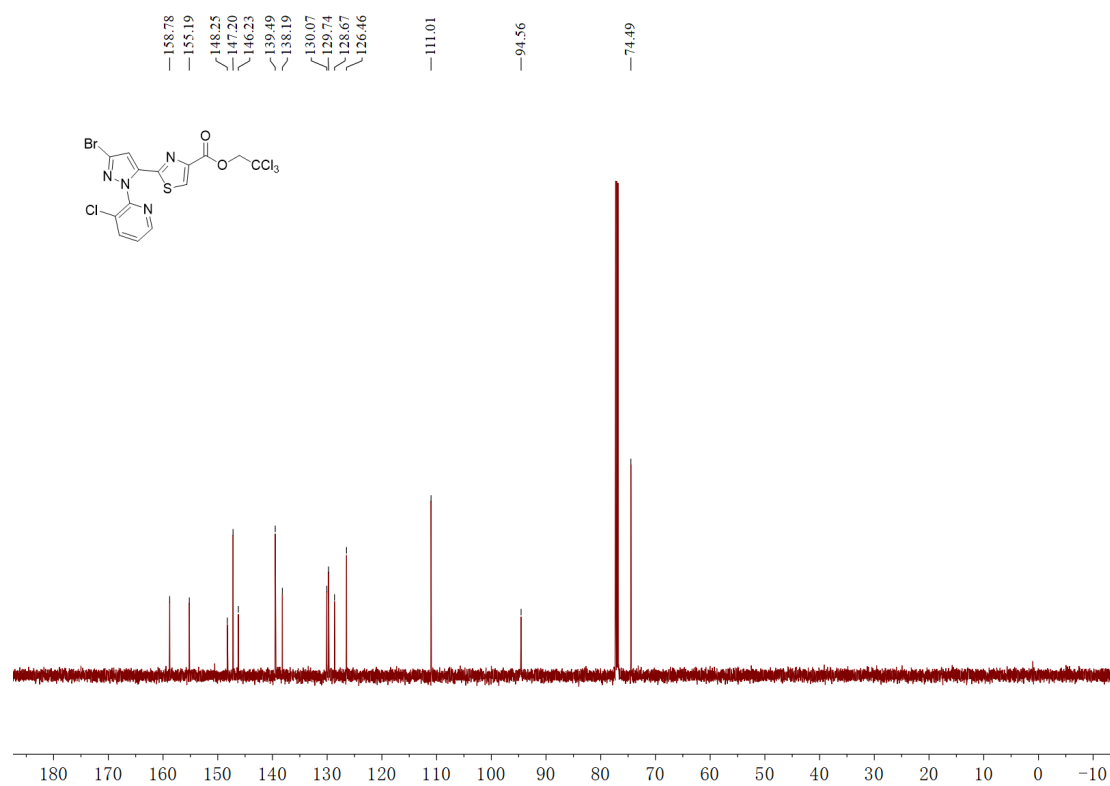

Figure S10. <sup>13</sup>C NMR spectrum of Compound 6d

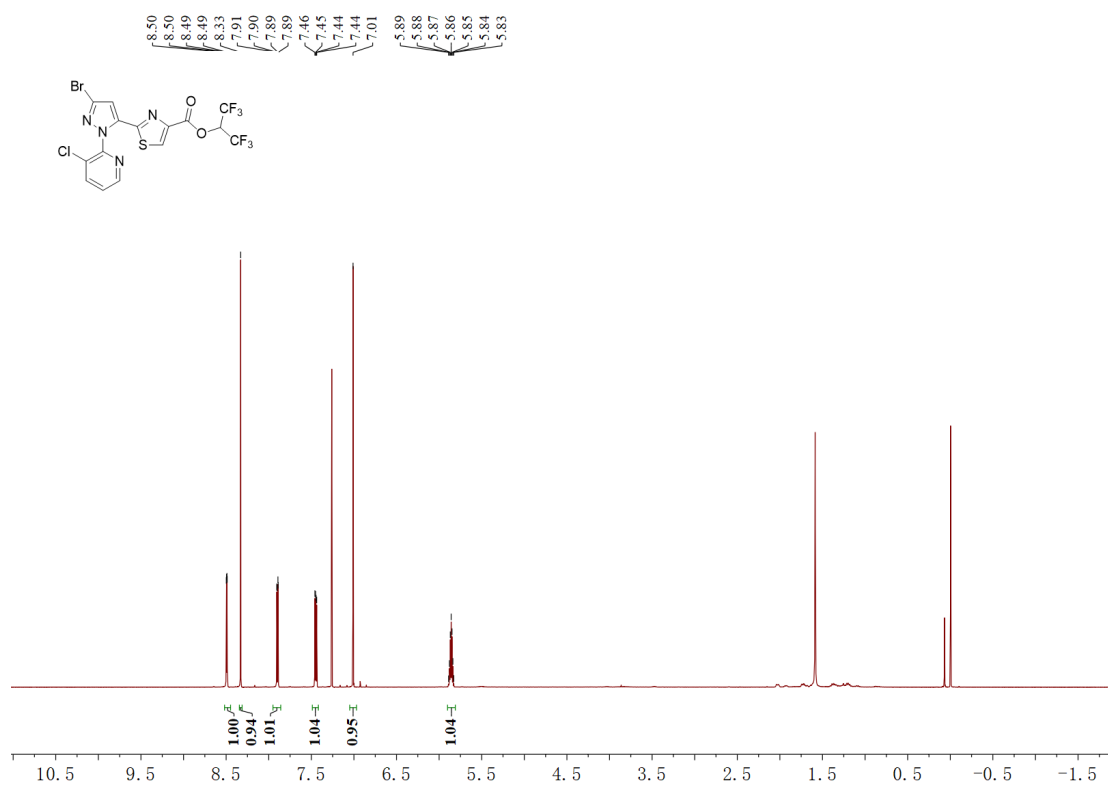

Figure S11. <sup>1</sup>H NMR spectrum of Compound 6e

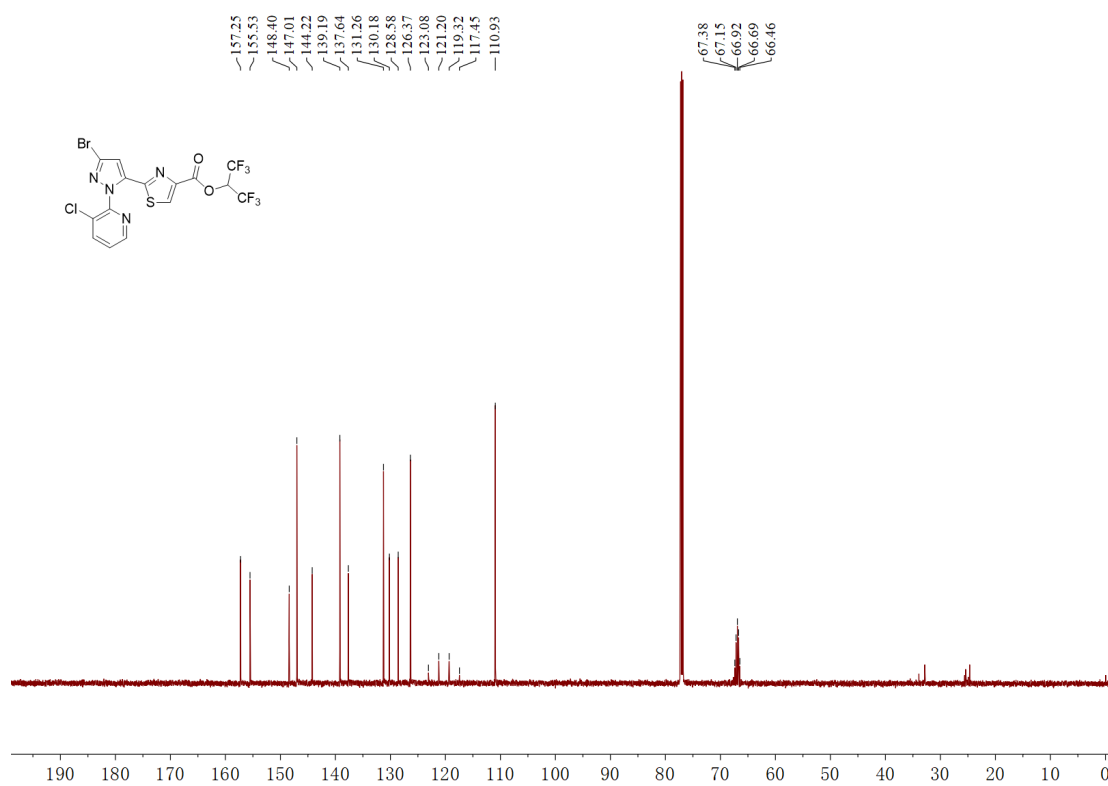

Figure S12. <sup>13</sup>C NMR spectrum of Compound 6e

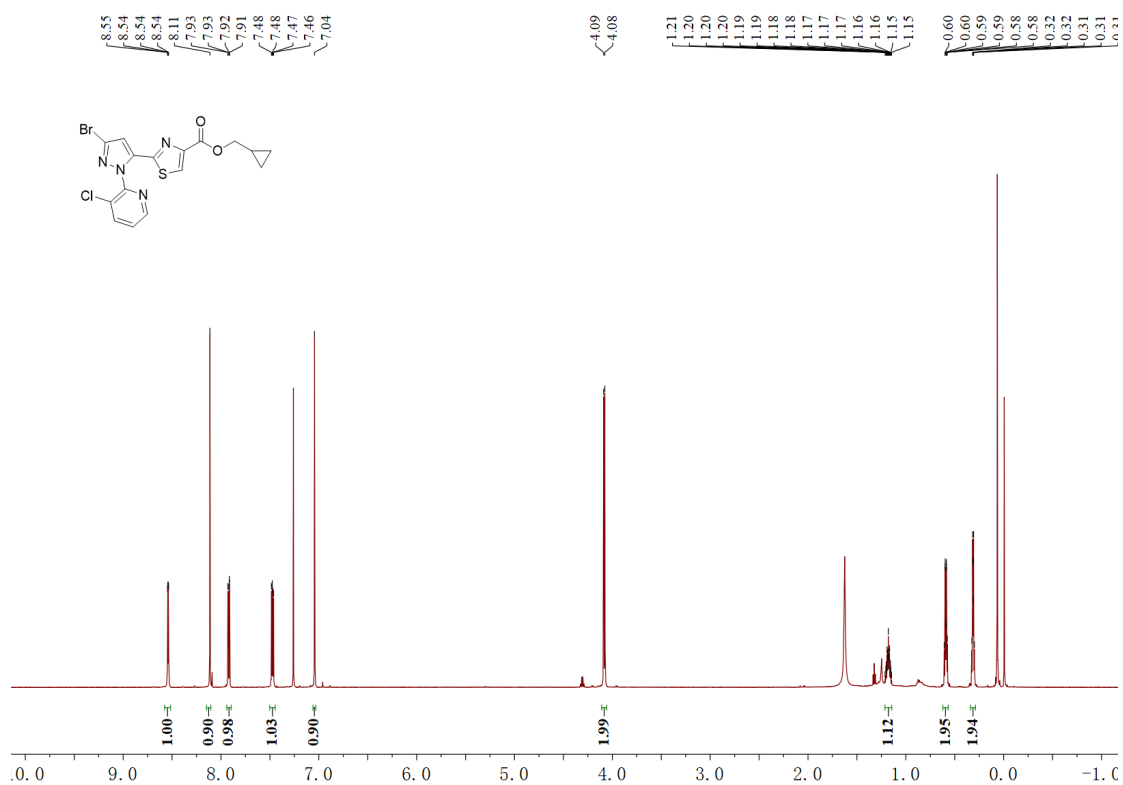

Figure S13. <sup>1</sup>H NMR spectrum of Compound 6f

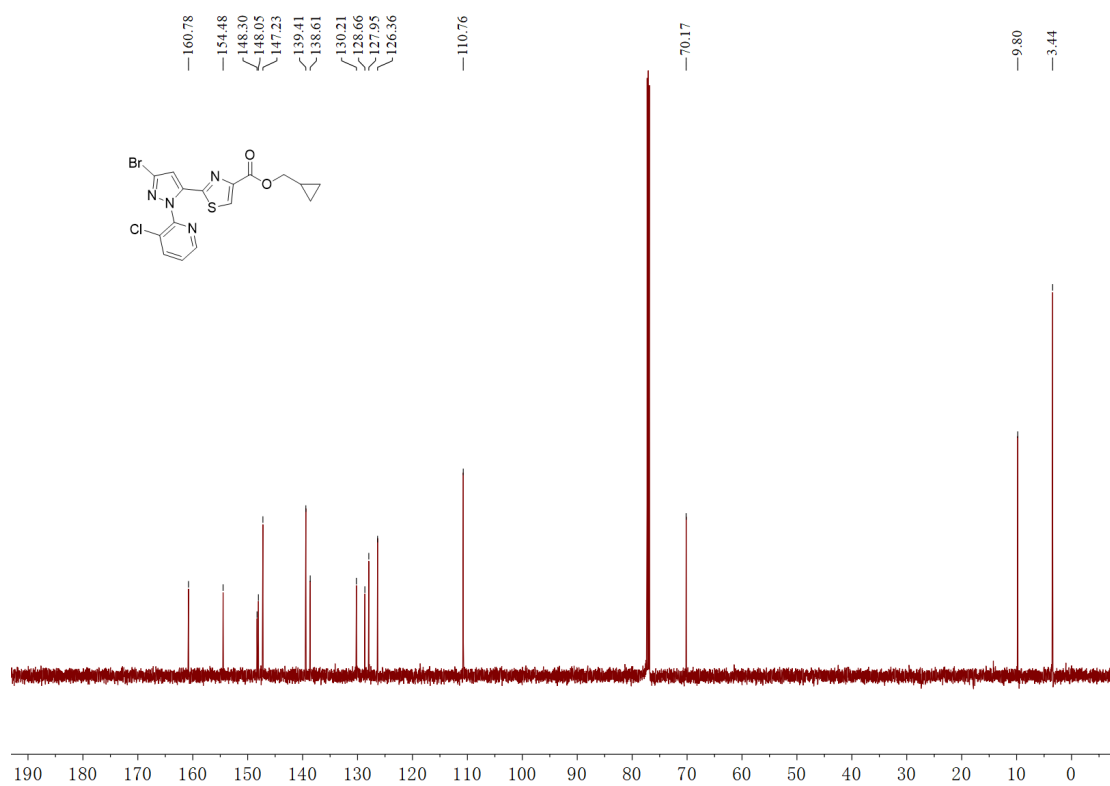

Figure S14. <sup>13</sup>C NMR spectrum of Compound 6f

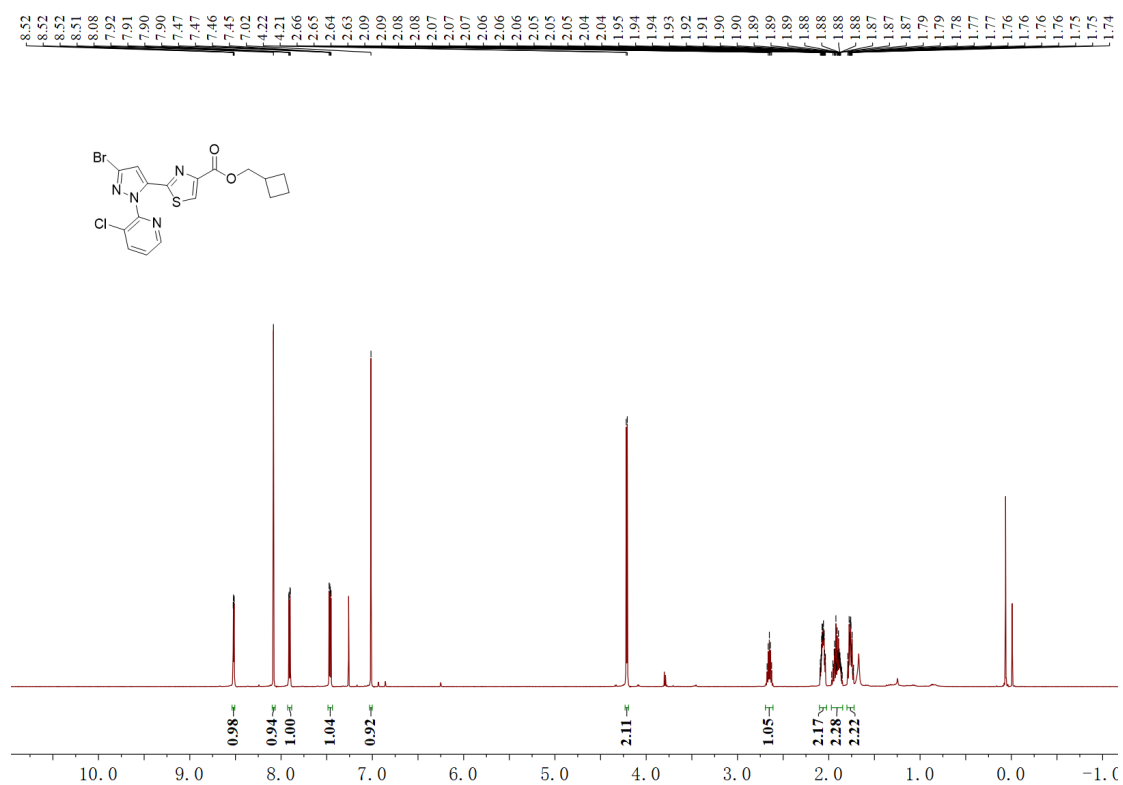

Figure S15. <sup>1</sup>H NMR spectrum of Compound 6g

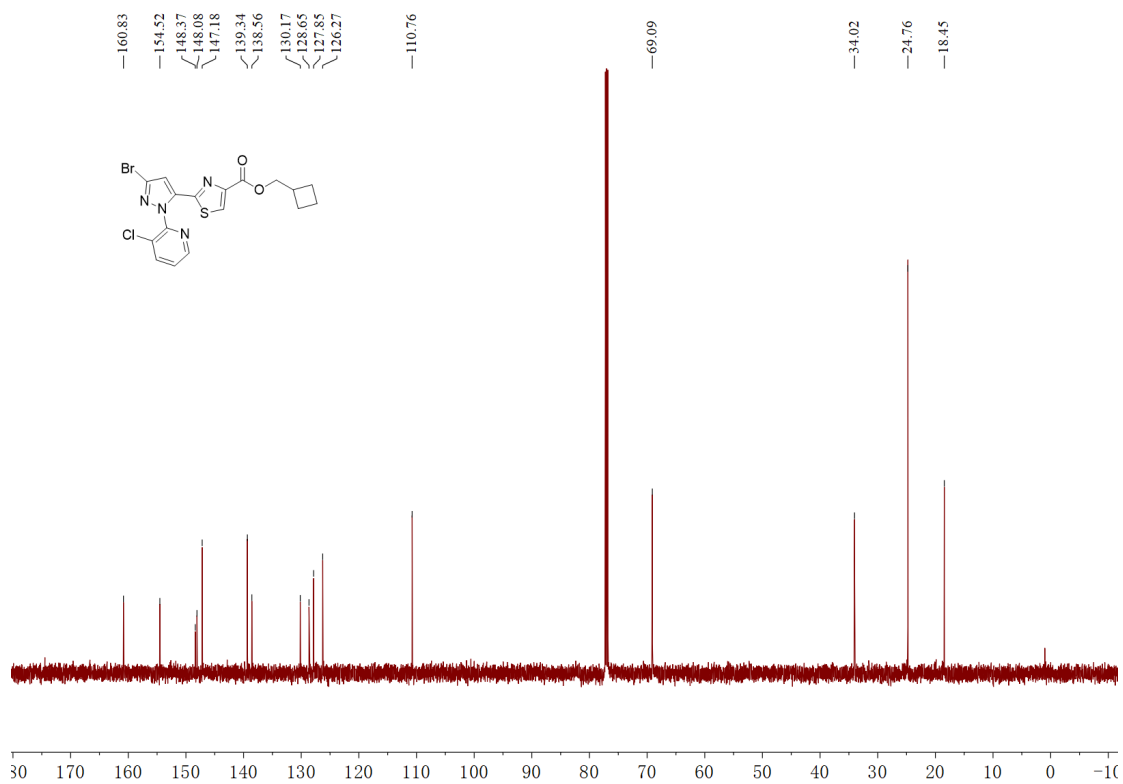

Figure S16. <sup>13</sup>C NMR spectrum of Compound 6g

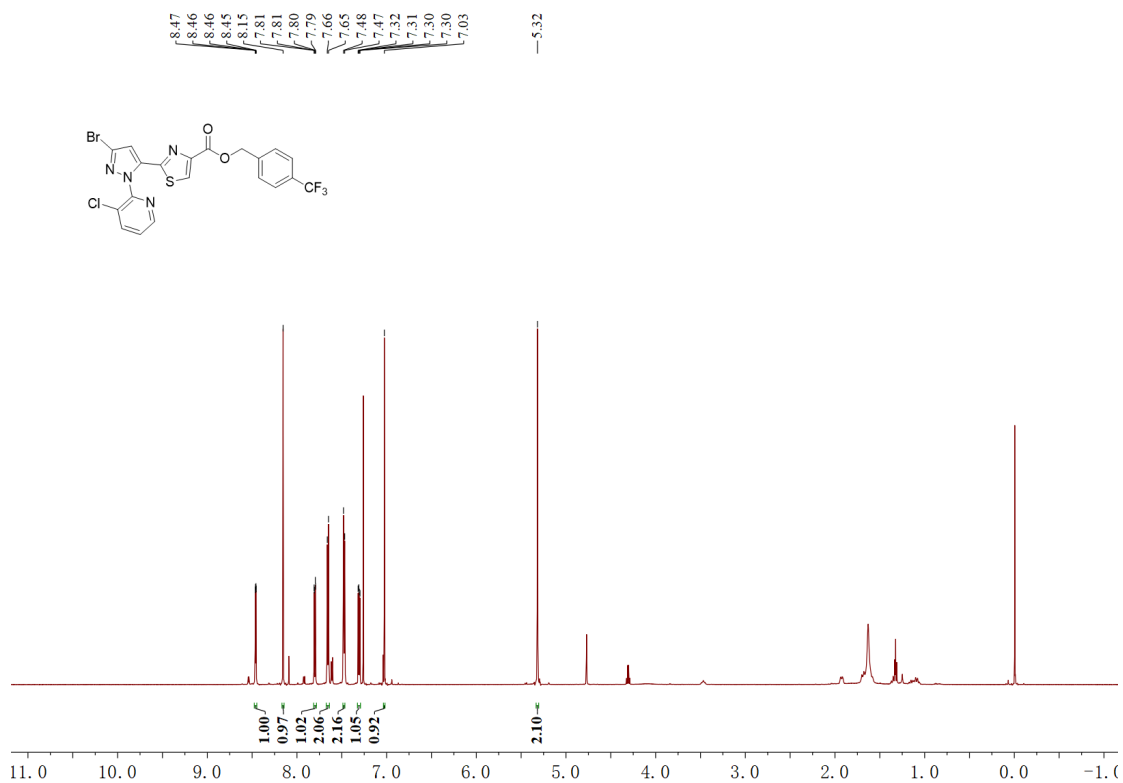

Figure S17. <sup>1</sup>H NMR spectrum of Compound 6h

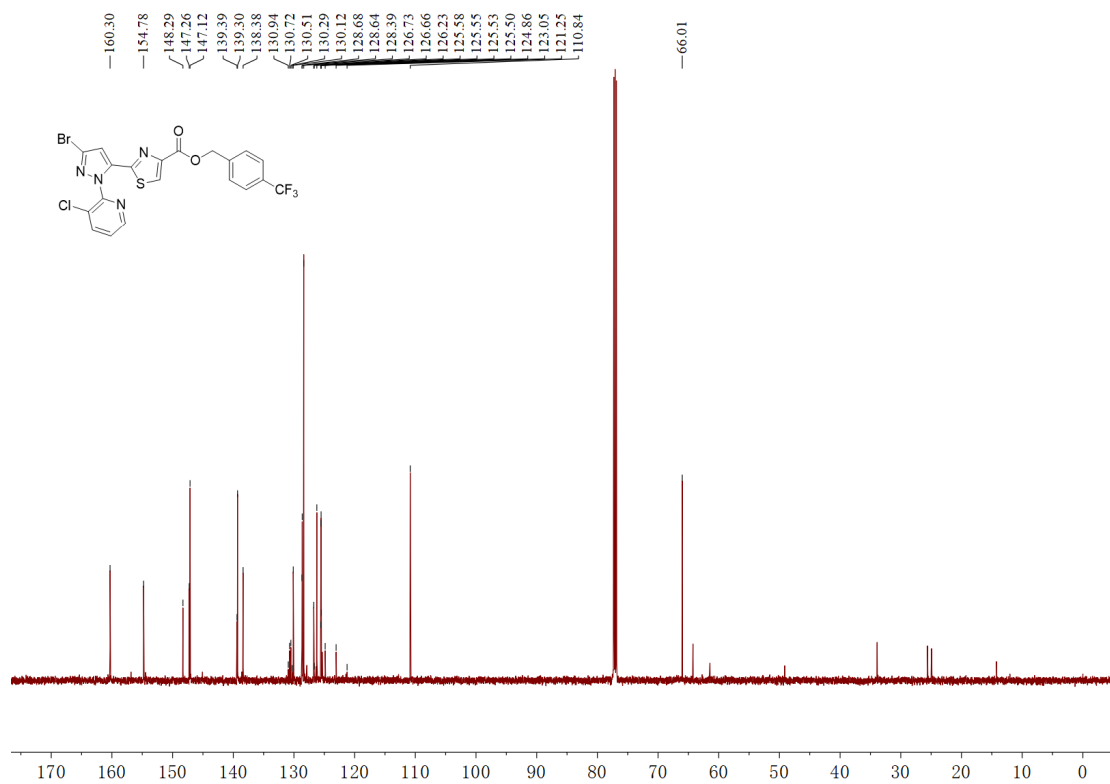

Figure S18. <sup>13</sup>C NMR spectrum of Compound 6h

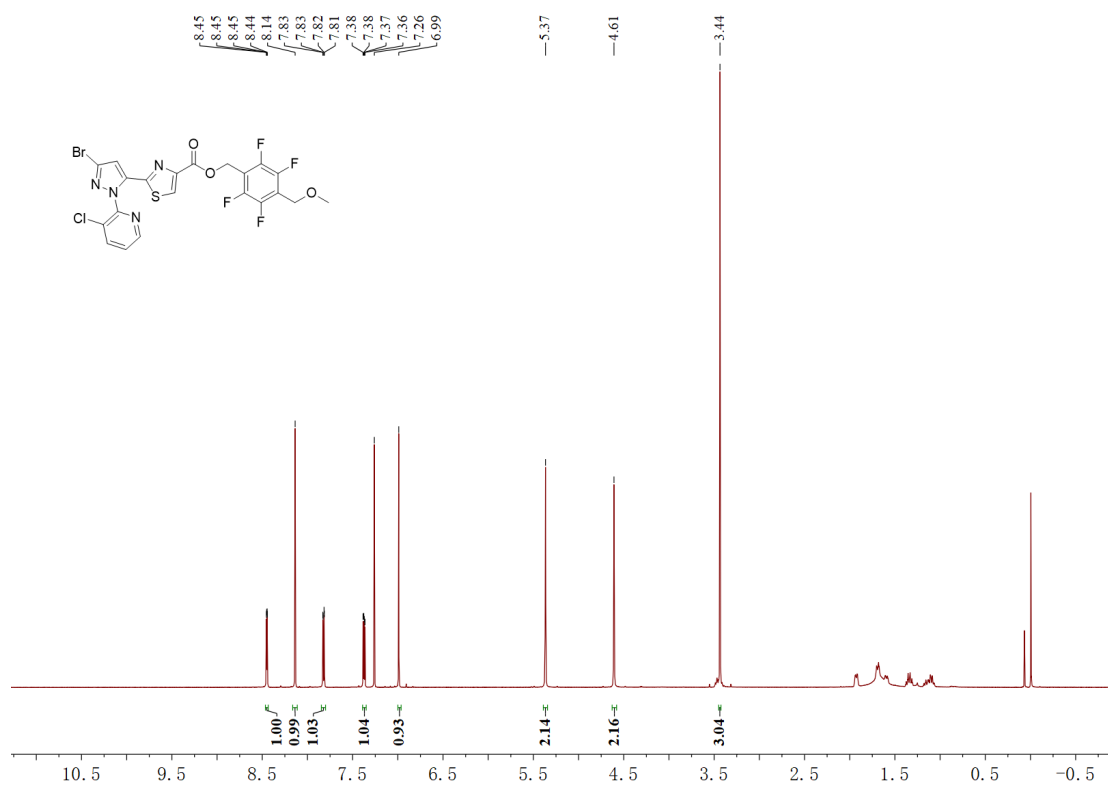

Figure S19. <sup>1</sup>H NMR spectrum of Compound 6i

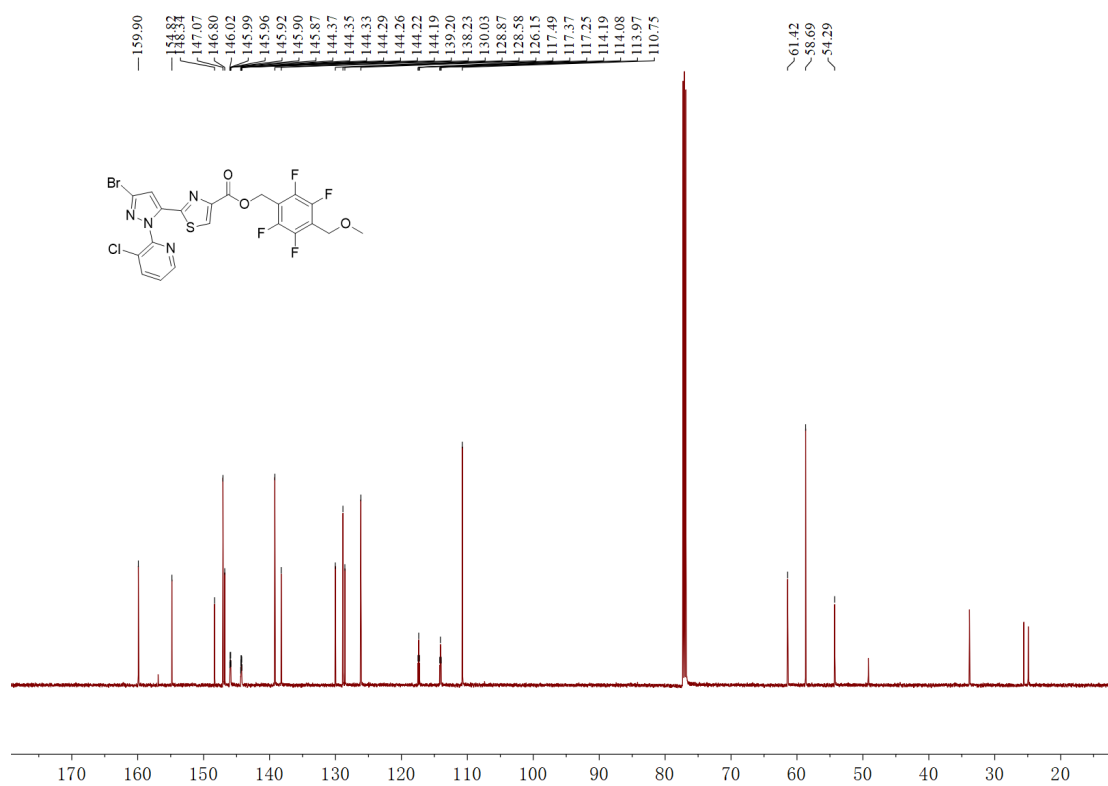

Figure S20. <sup>13</sup>C NMR spectrum of Compound 6i

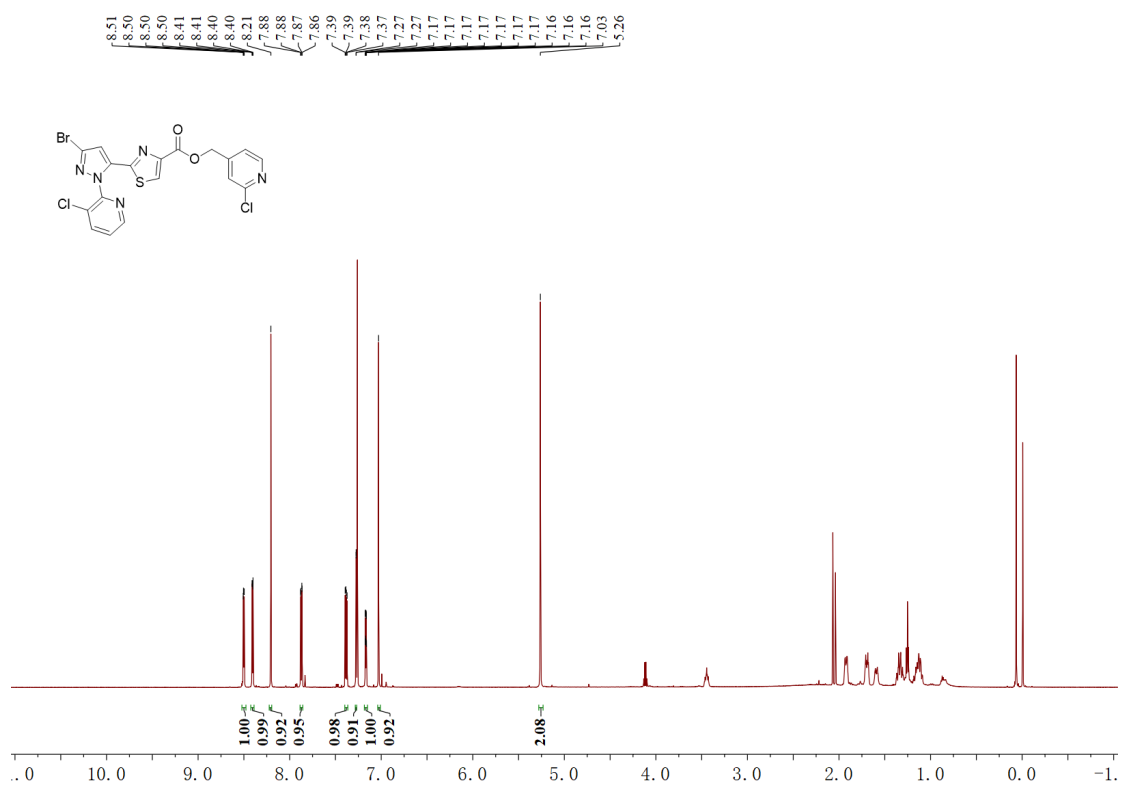

Figure S21. <sup>1</sup>H NMR spectrum of Compound 6j

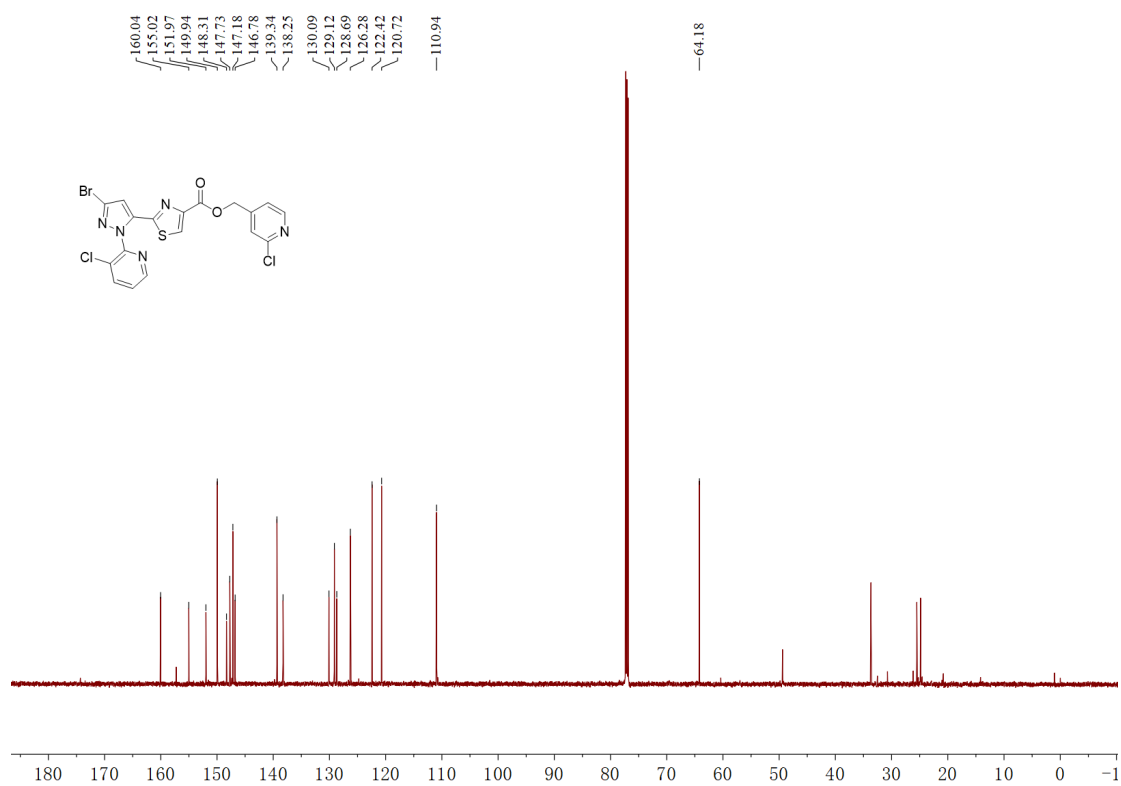

Figure S22. <sup>13</sup>C NMR spectrum of Compound 6j

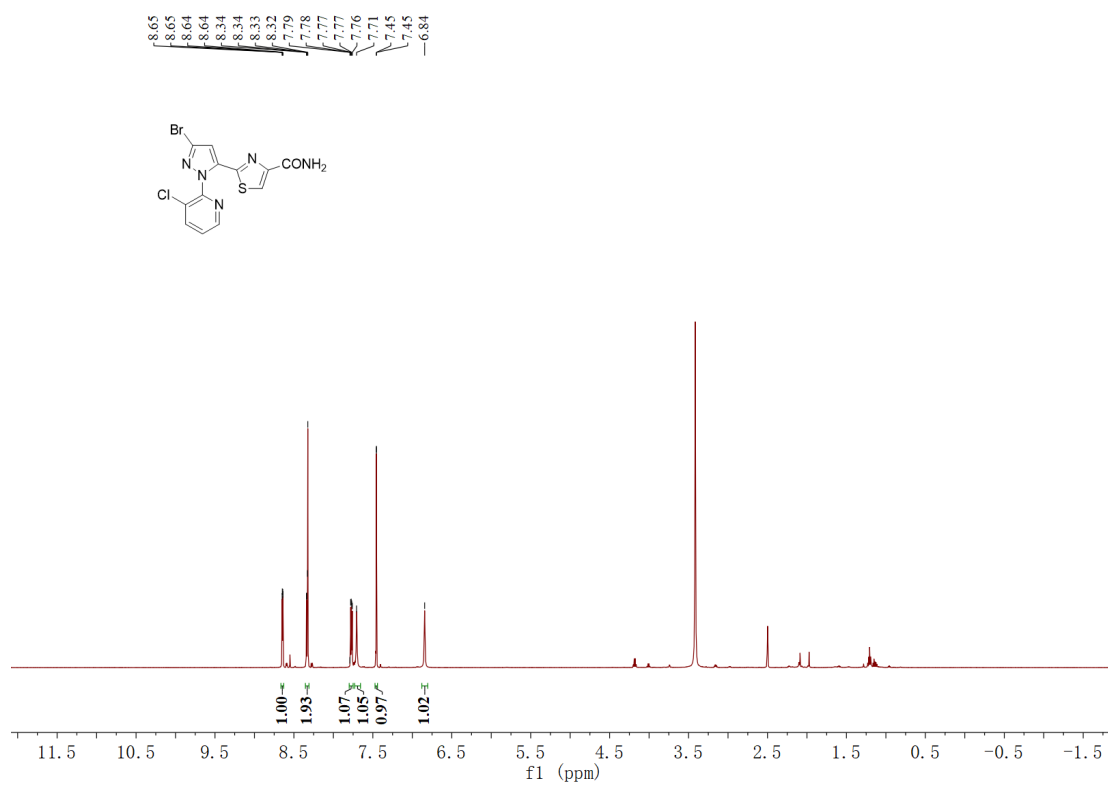

Figure S23. <sup>1</sup>H NMR spectrum of Compound 7a

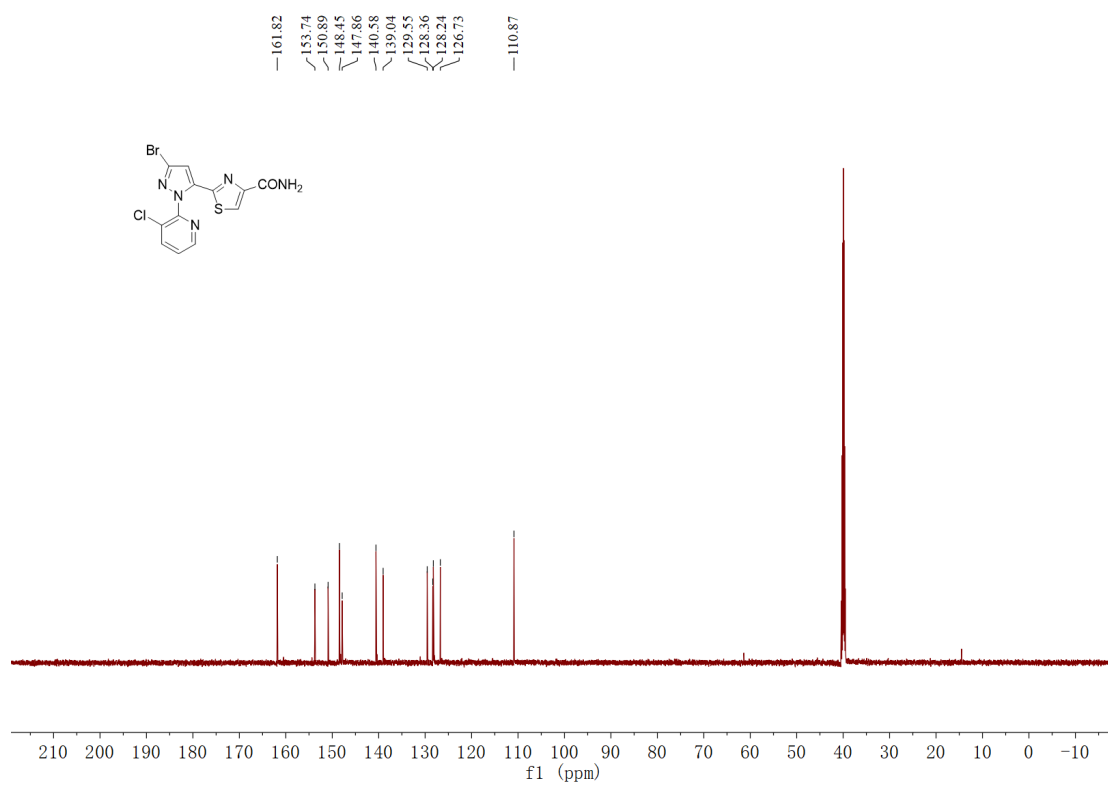

Figure S24. <sup>13</sup>C NMR spectrum of Compound 7a

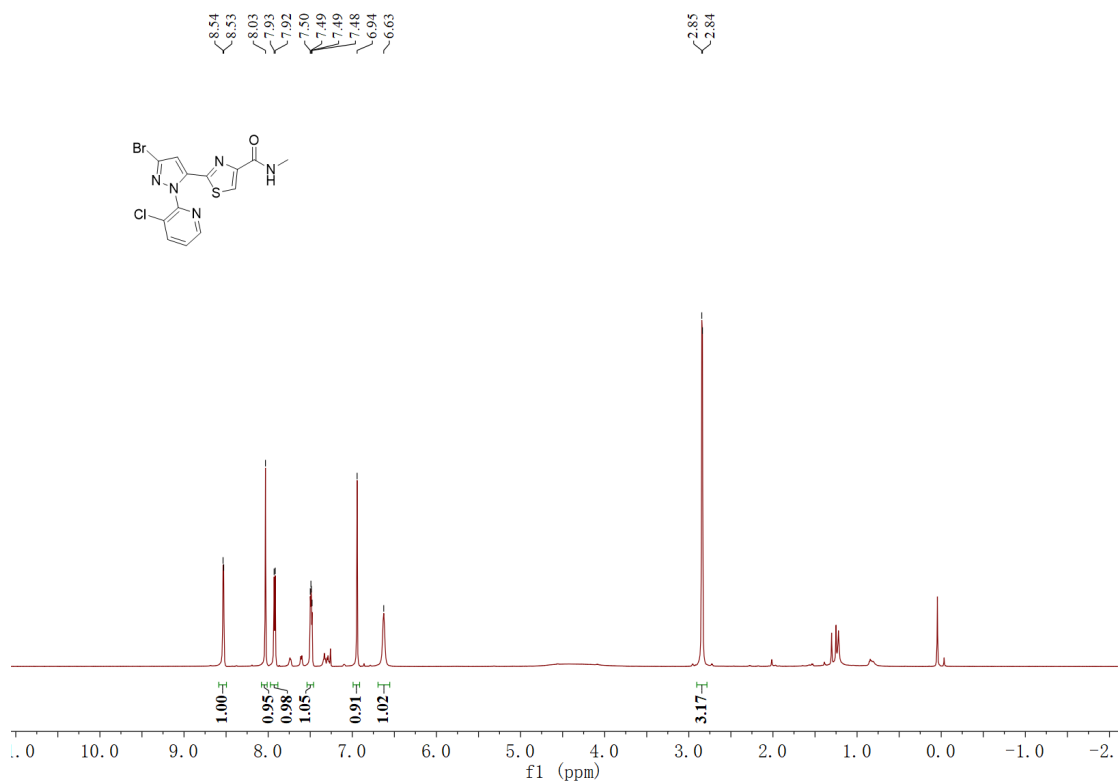

**Figure S25.** <sup>1</sup>H NMR spectrum of Compound 7b

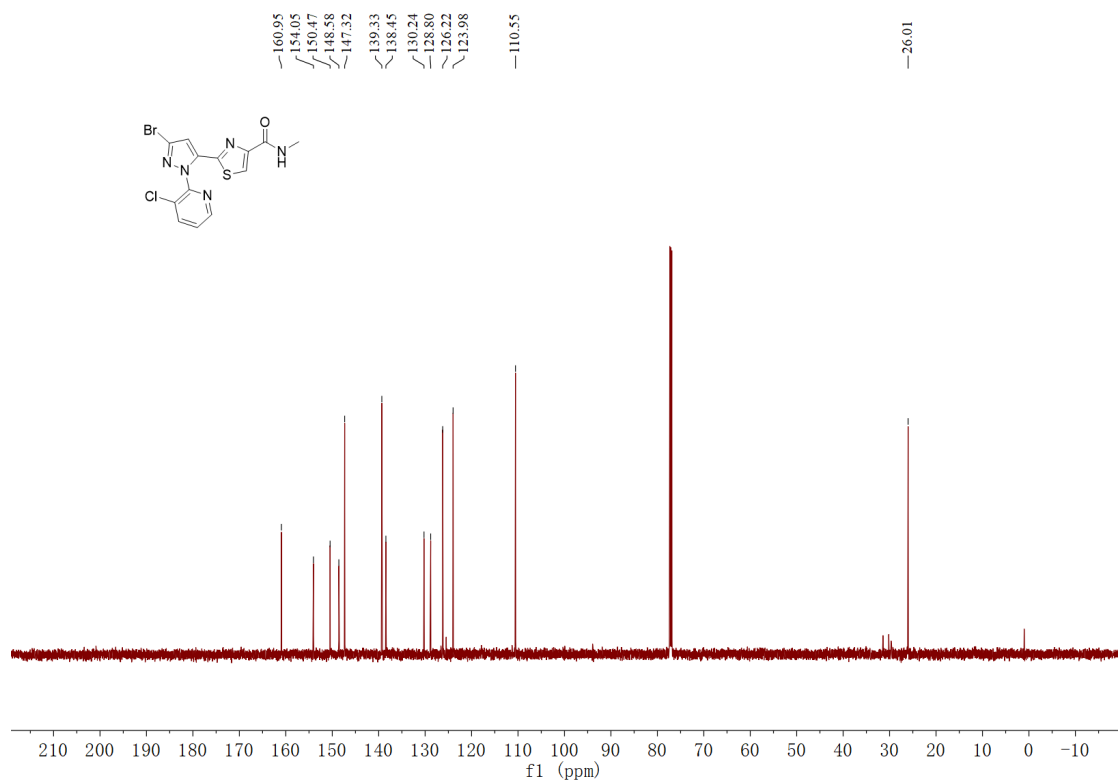

**Figure S26.** <sup>13</sup>C NMR spectrum of Compound 7b

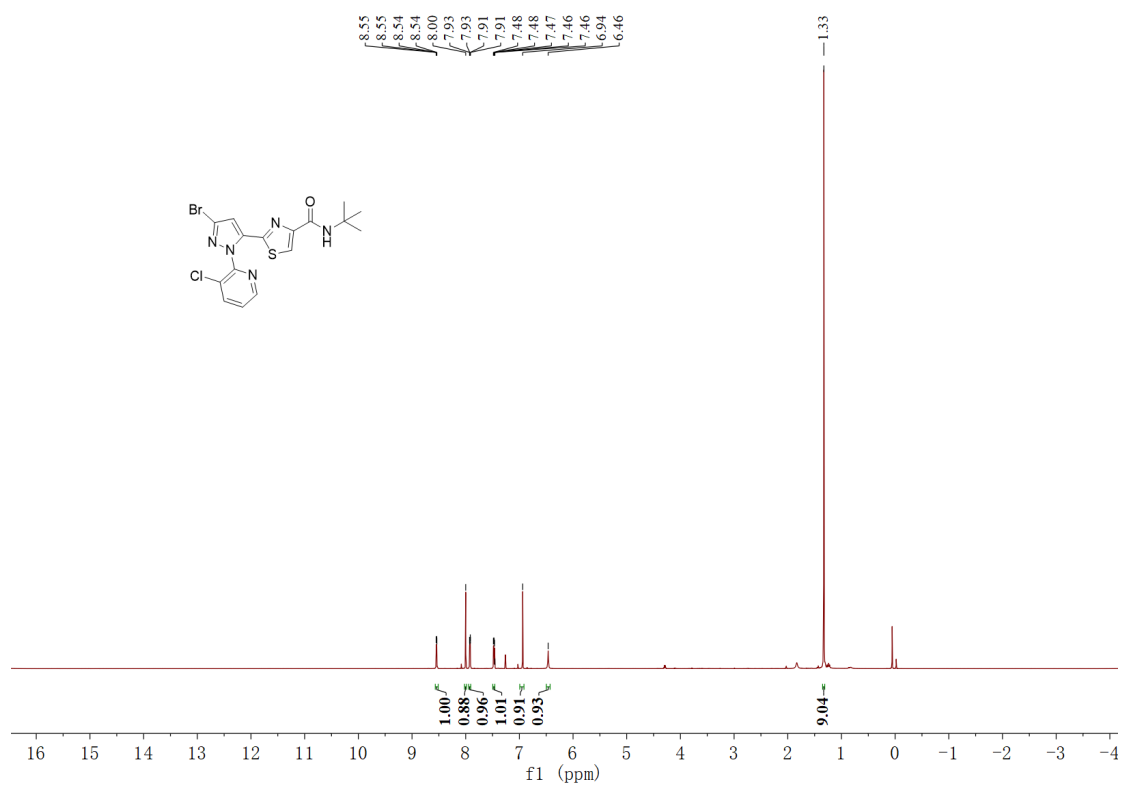

**Figure S27.** <sup>1</sup>H NMR spectrum of Compound 7c

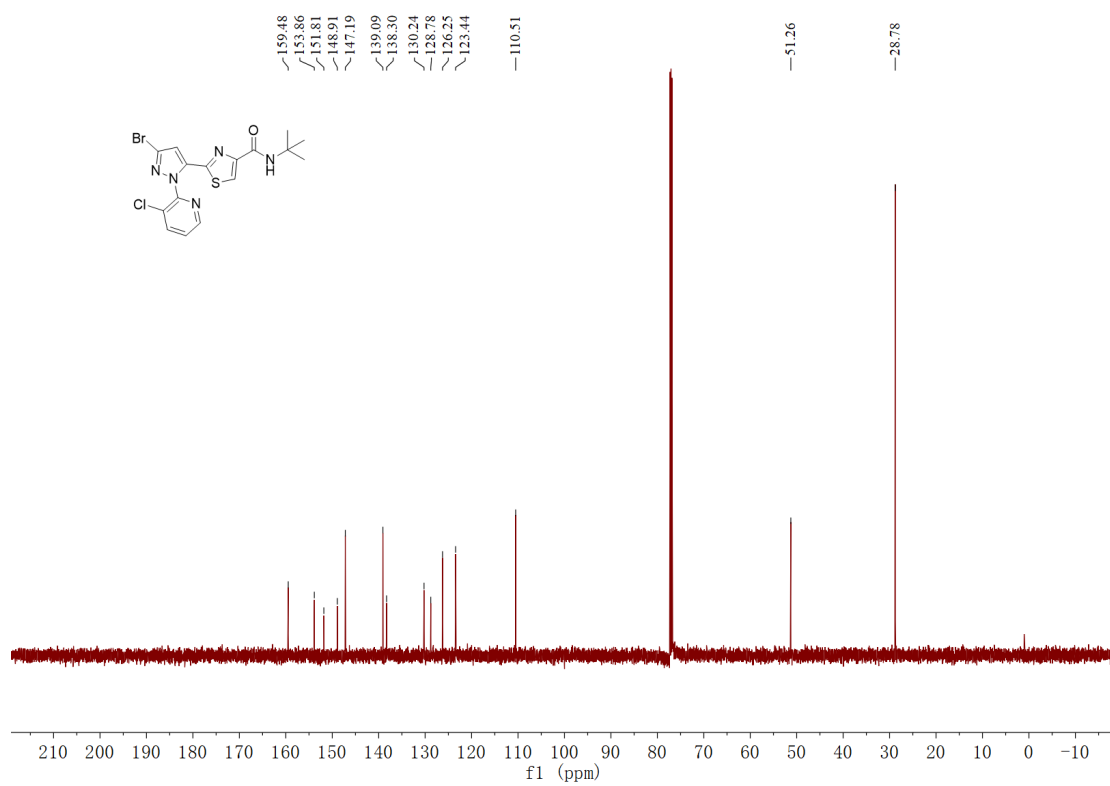

**Figure S28.** <sup>13</sup>C NMR spectrum of Compound 7c

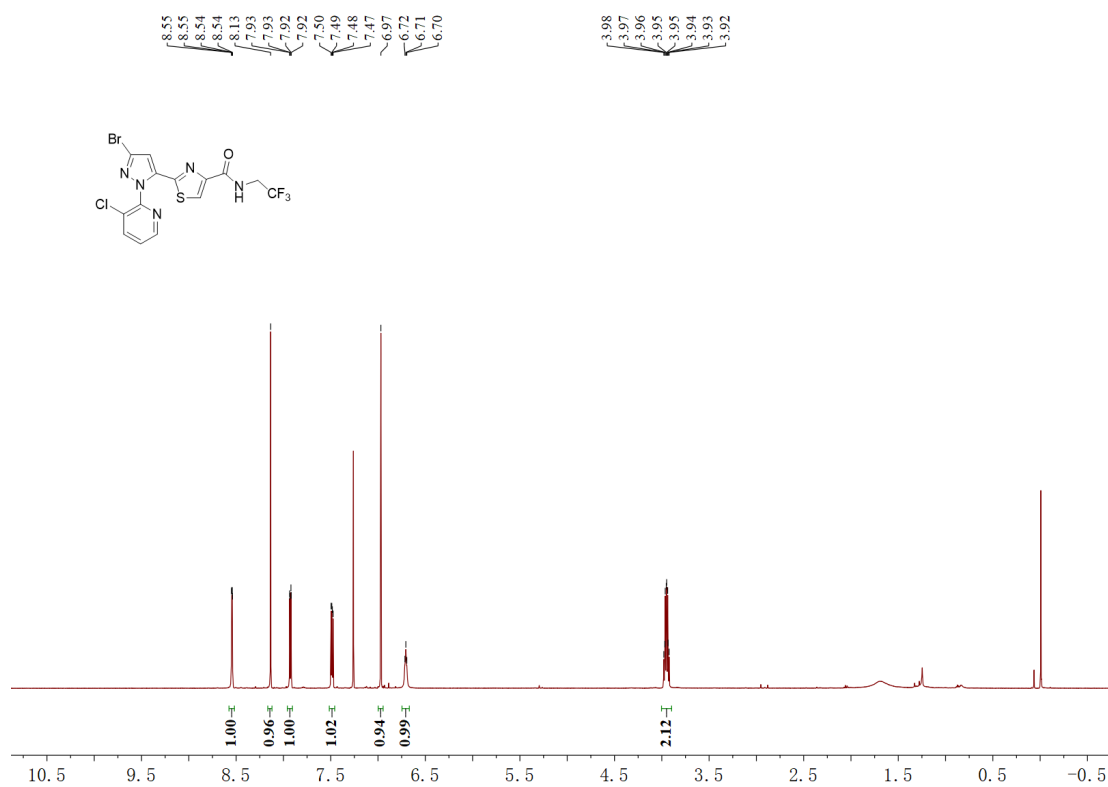

**Figure S29.** <sup>1</sup>H NMR spectrum of Compound 7d

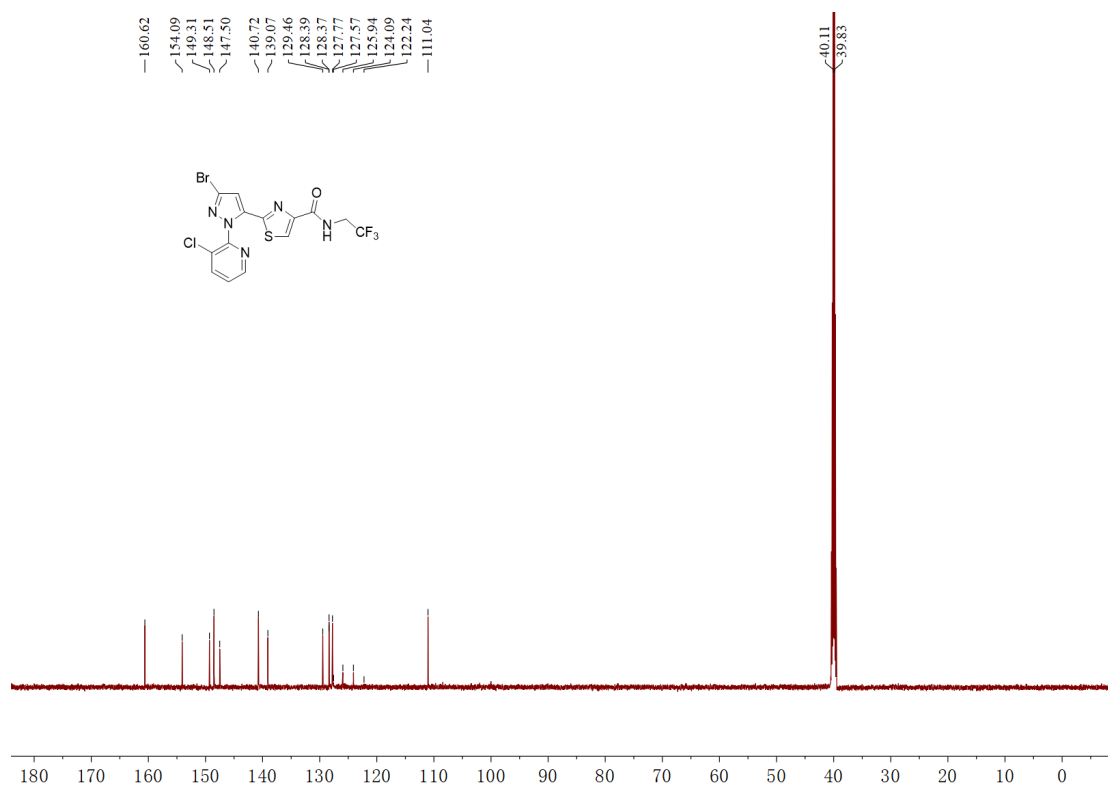

**Figure S30.** <sup>13</sup>C NMR spectrum of Compound 7d

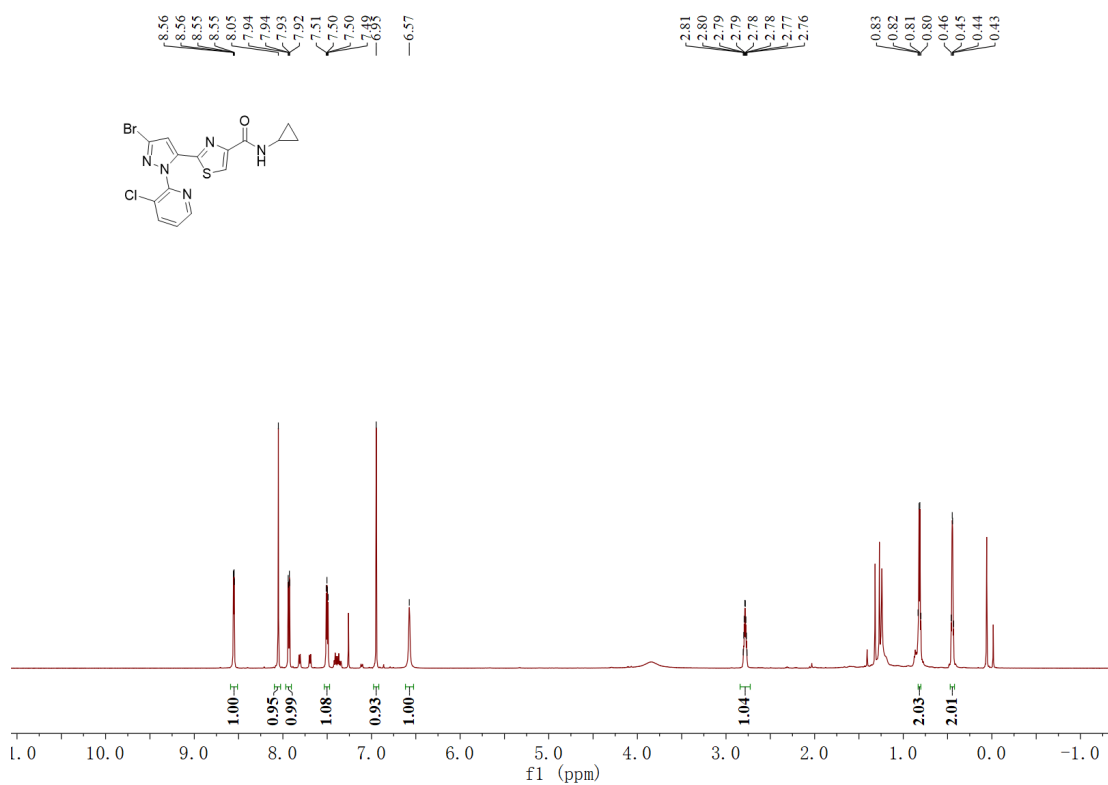

Figure S31. <sup>1</sup>H NMR spectrum of Compound 7e

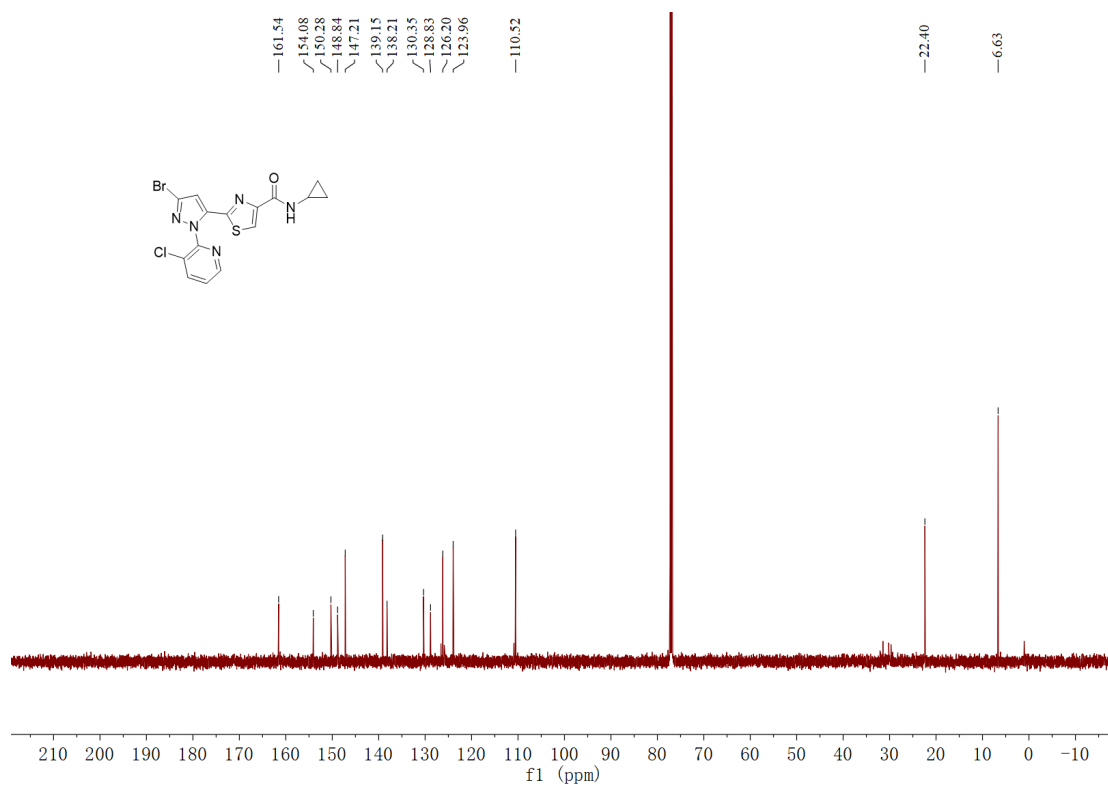

Figure S32. <sup>13</sup>C NMR spectrum of Compound 7e

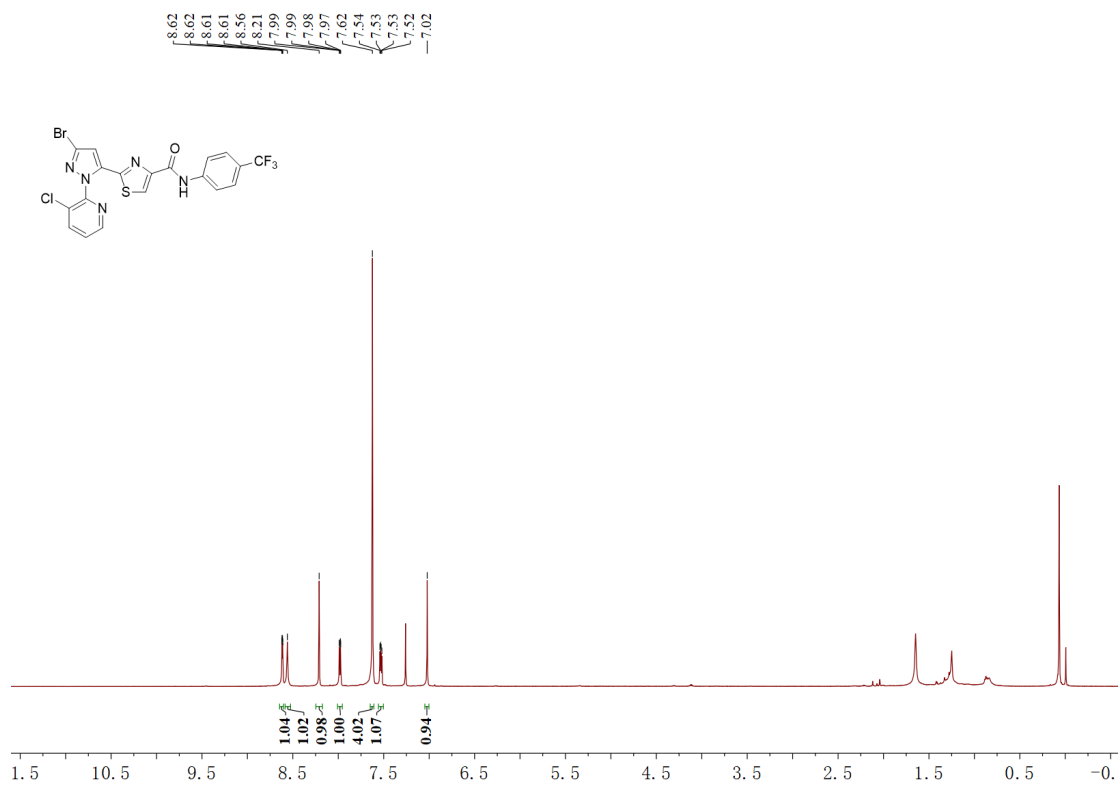

Figure S33. <sup>1</sup>H NMR spectrum of Compound 7f

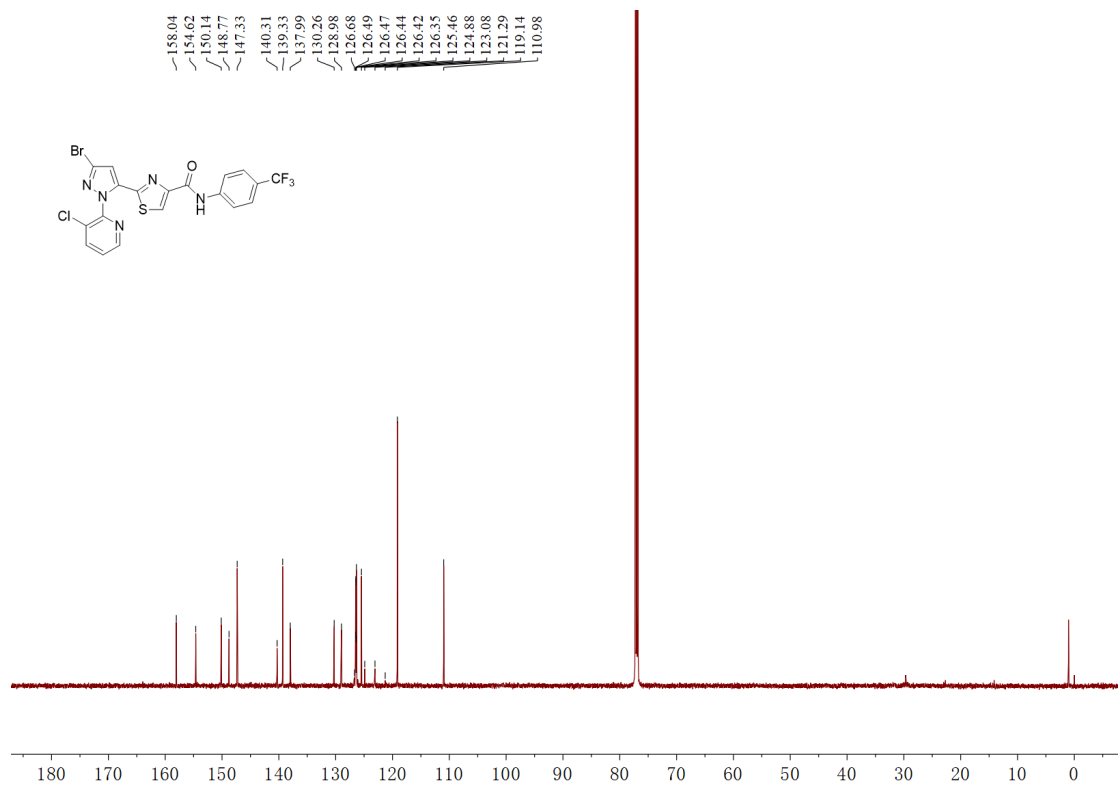

Figure S34. <sup>13</sup>C NMR spectrum of Compound 7f

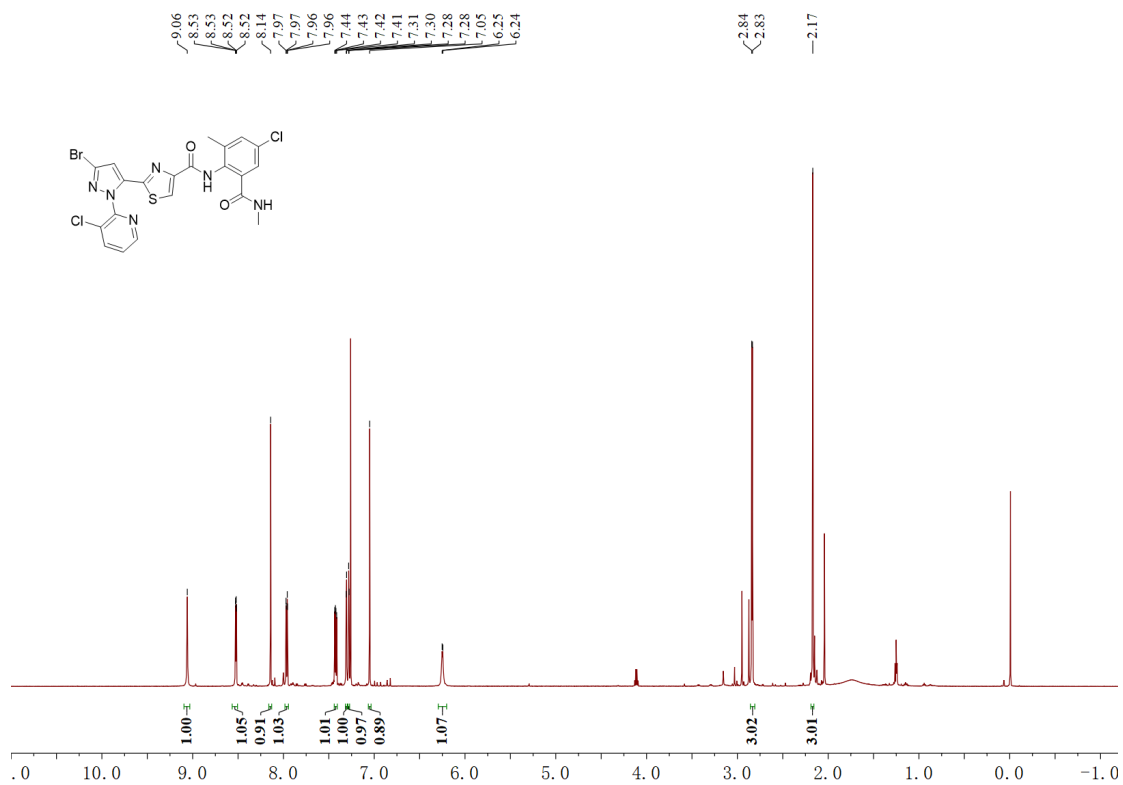

**Figure S35.** <sup>1</sup>H NMR spectrum of Compound **7g**

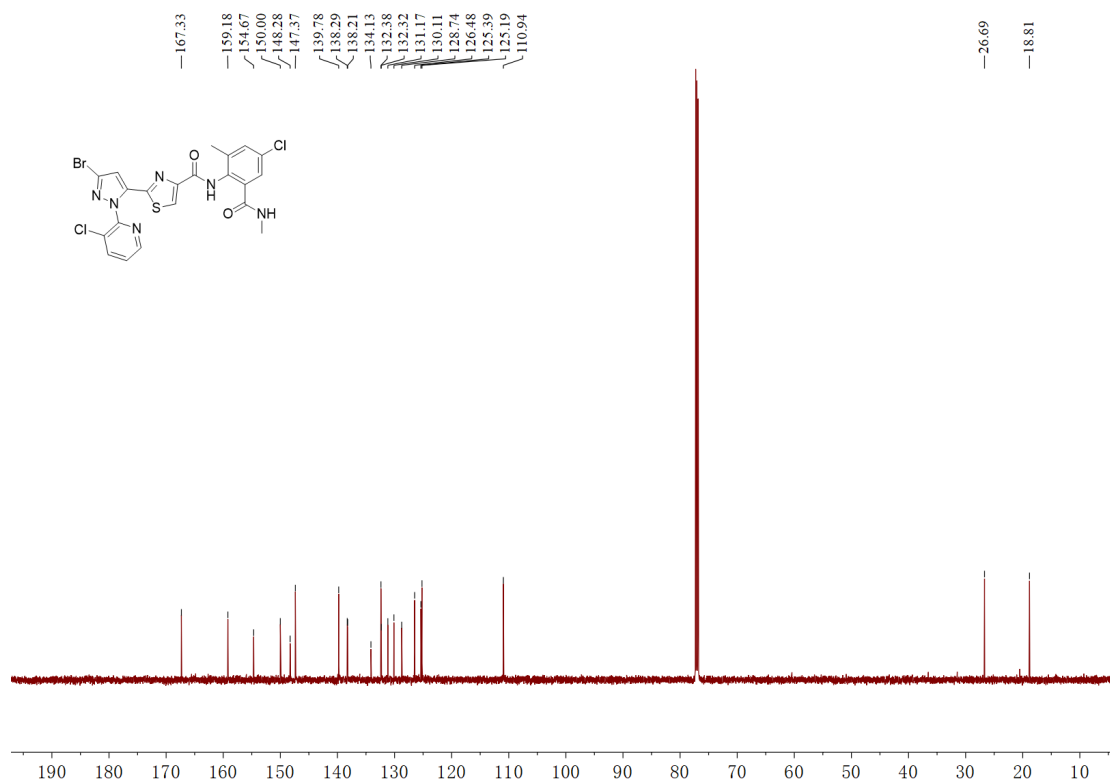

**Figure S36.** <sup>13</sup>C NMR spectrum of Compound **7g**

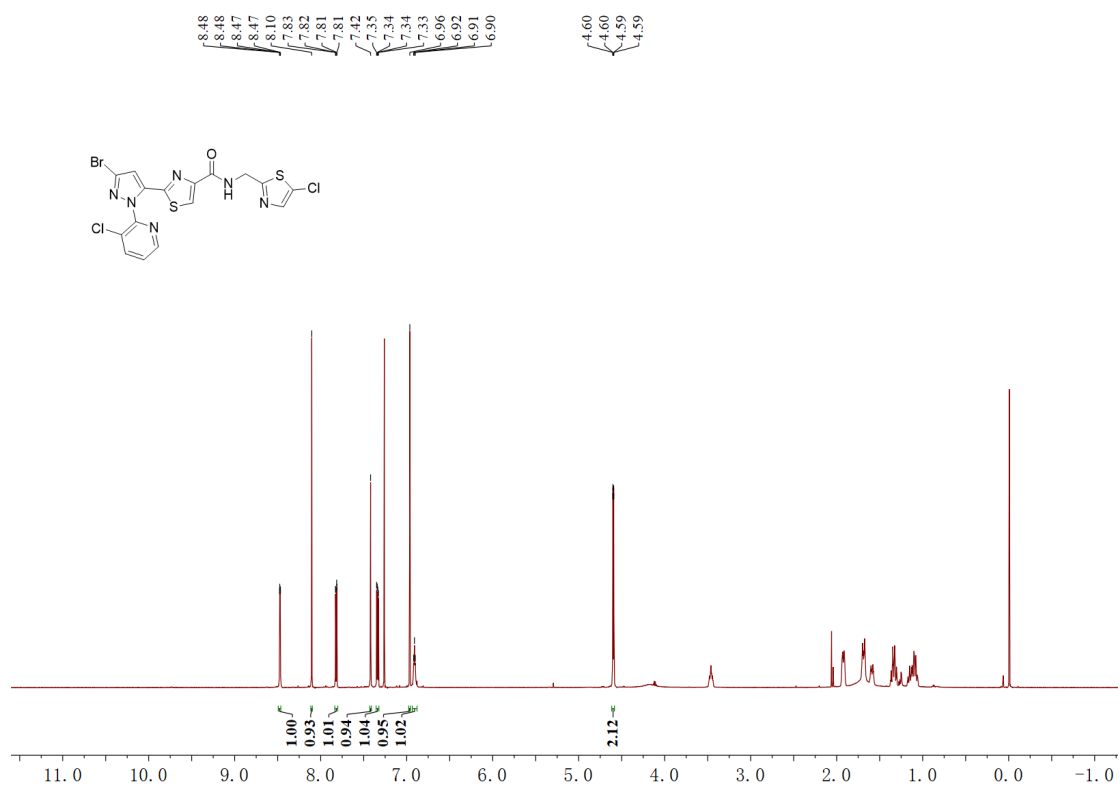

**Figure S37.** <sup>1</sup>H NMR spectrum of Compound 7h

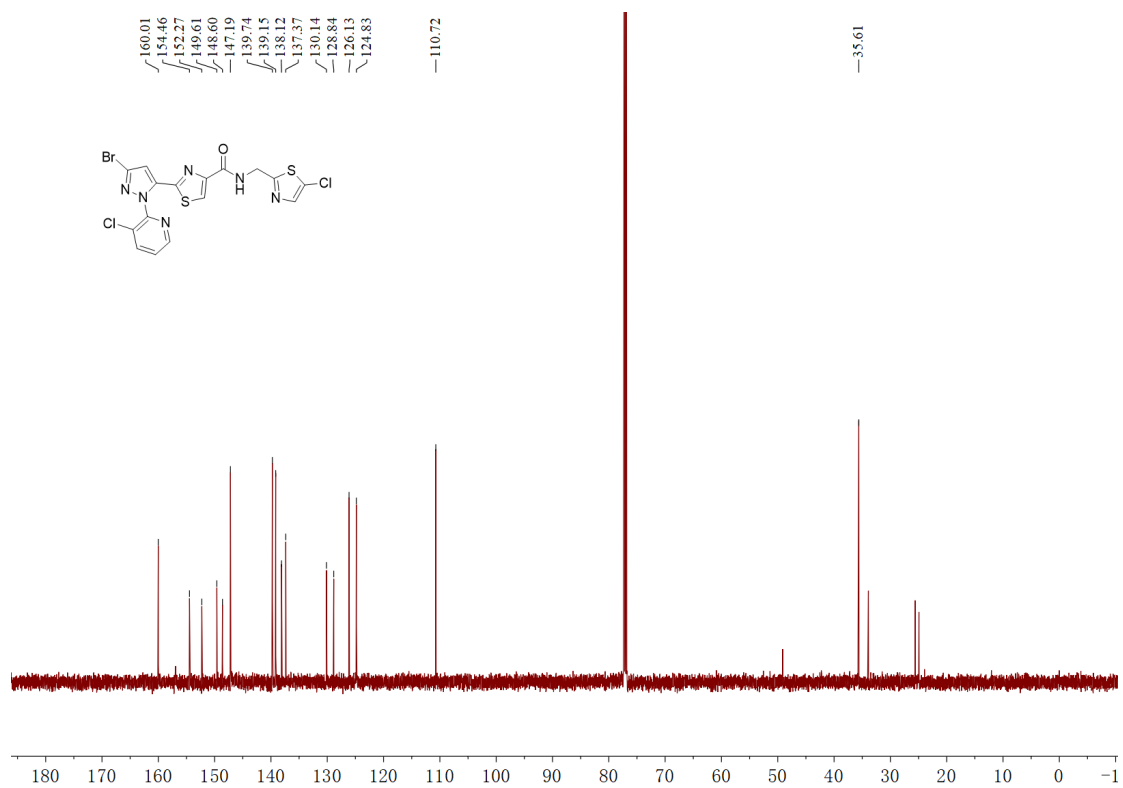

**Figure S38.** <sup>13</sup>C NMR spectrum of Compound 7h

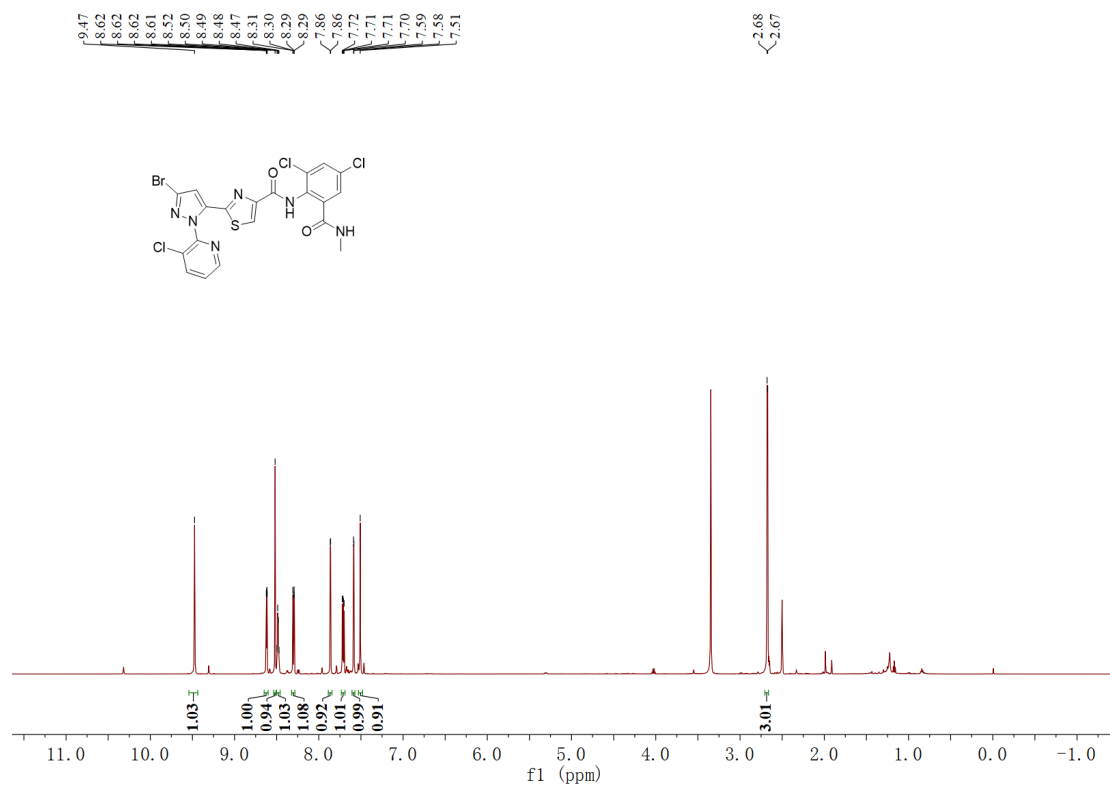

**Figure S39.** <sup>1</sup>H NMR spectrum of Compound 7i

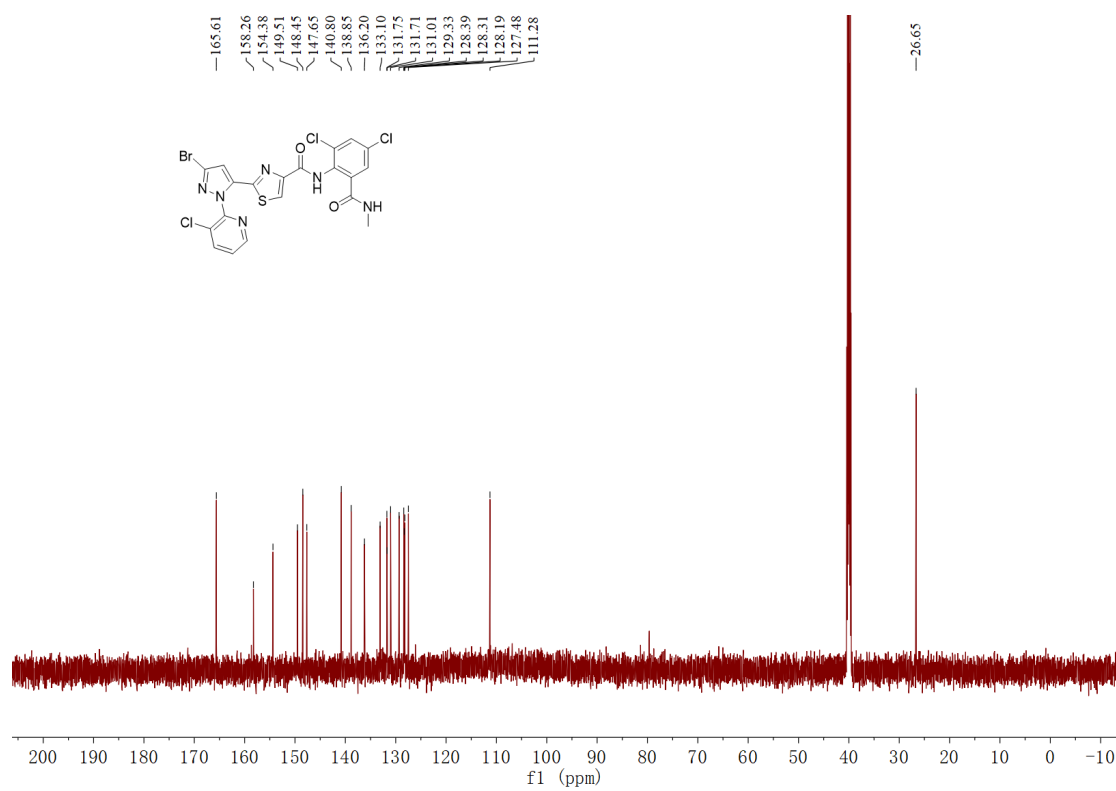

**Figure S40.** <sup>13</sup>C NMR spectrum of Compound 7i

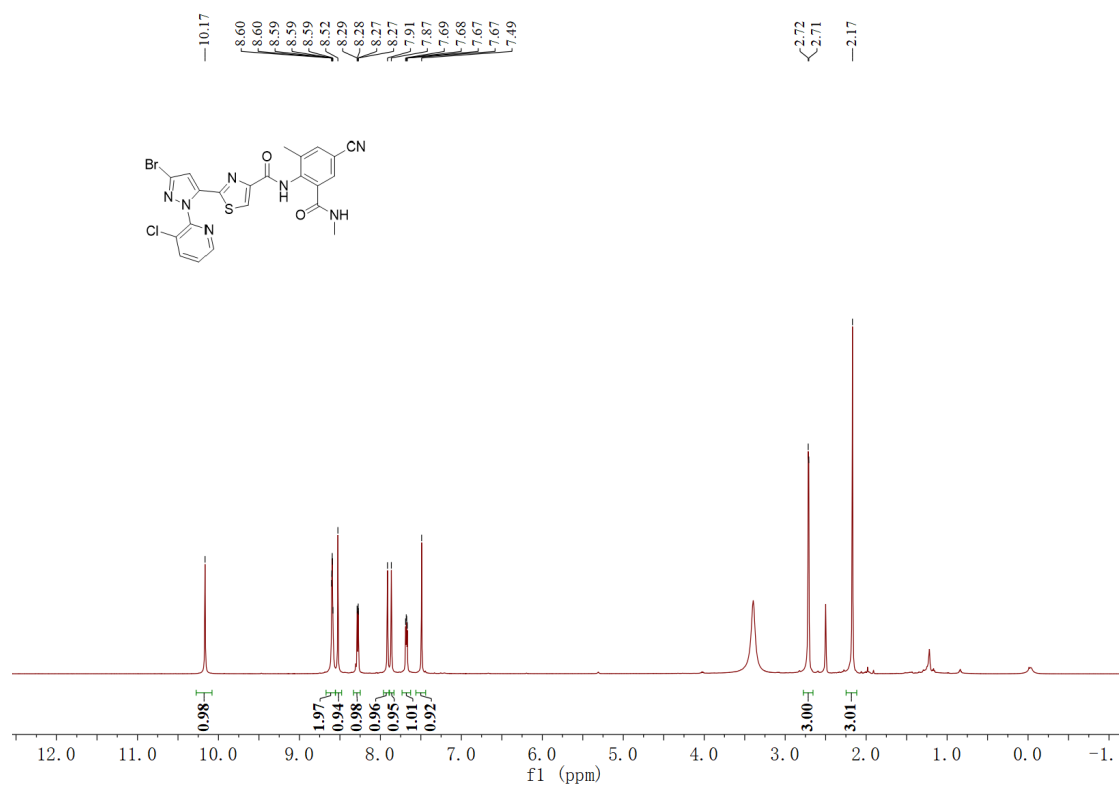

**Figure S41.** <sup>1</sup>H NMR spectrum of Compound **7j**

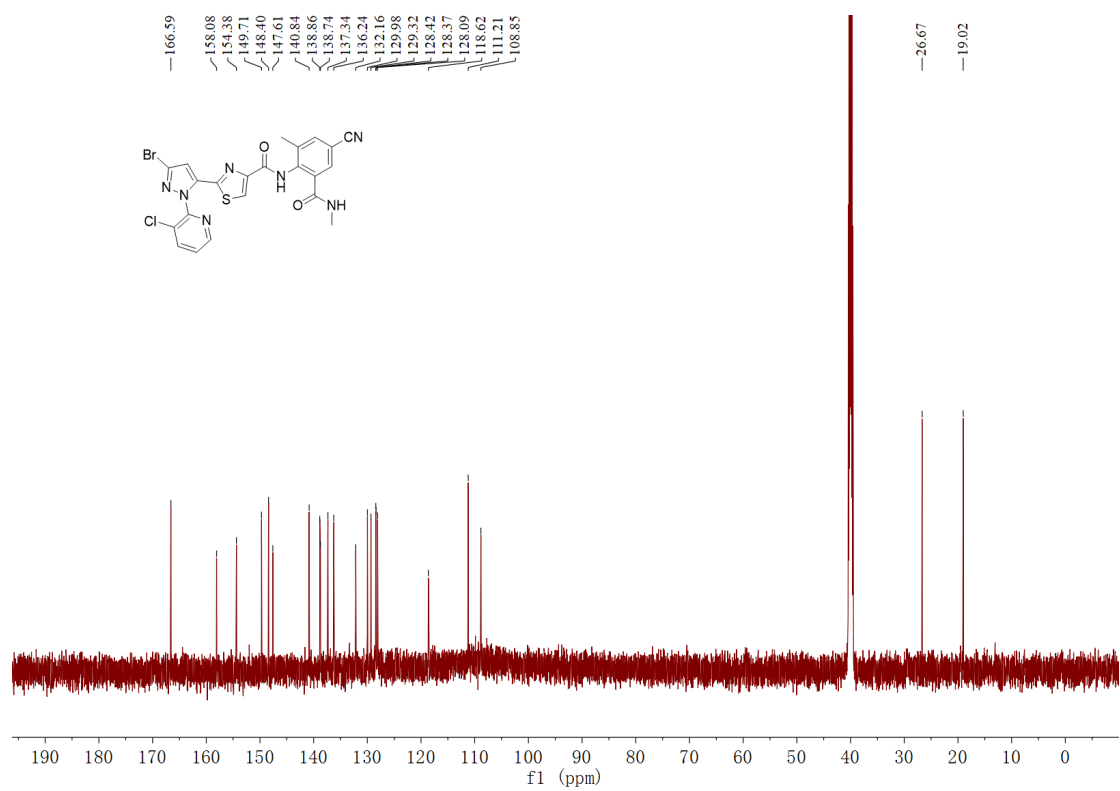

**Figure S42.** <sup>13</sup>C NMR spectrum of Compound **7j**

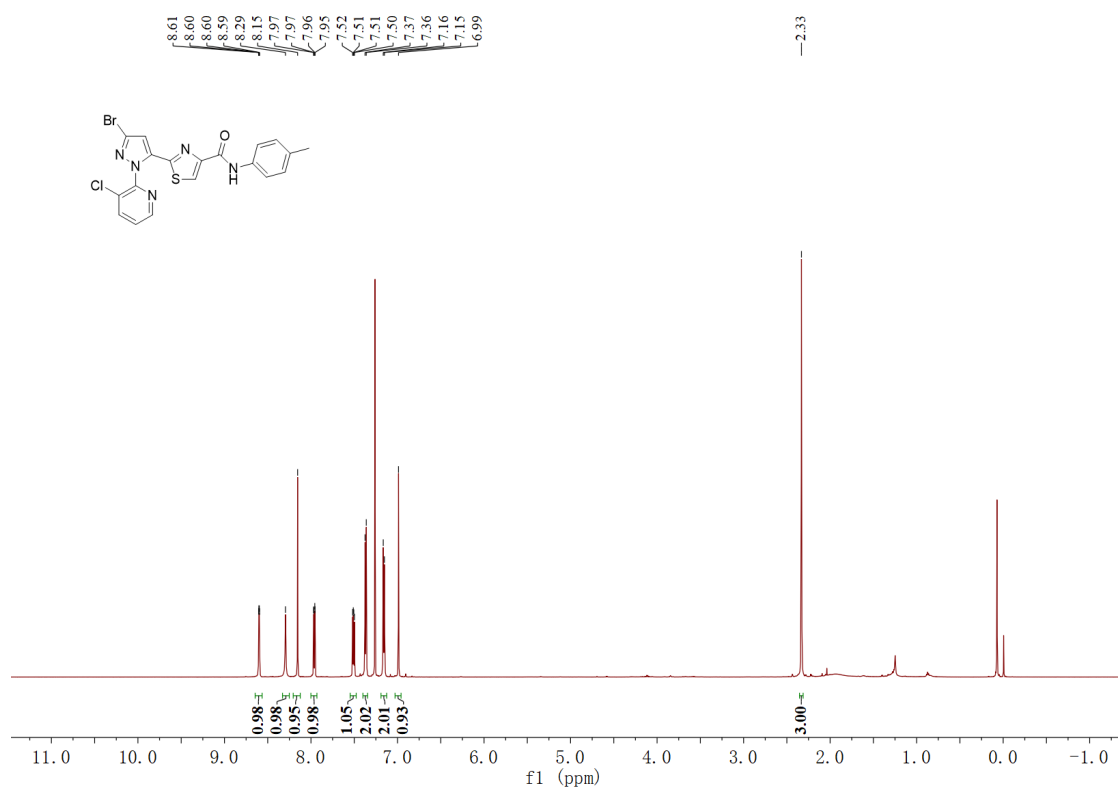

**Figure S43.** <sup>1</sup>H NMR spectrum of Compound 7k

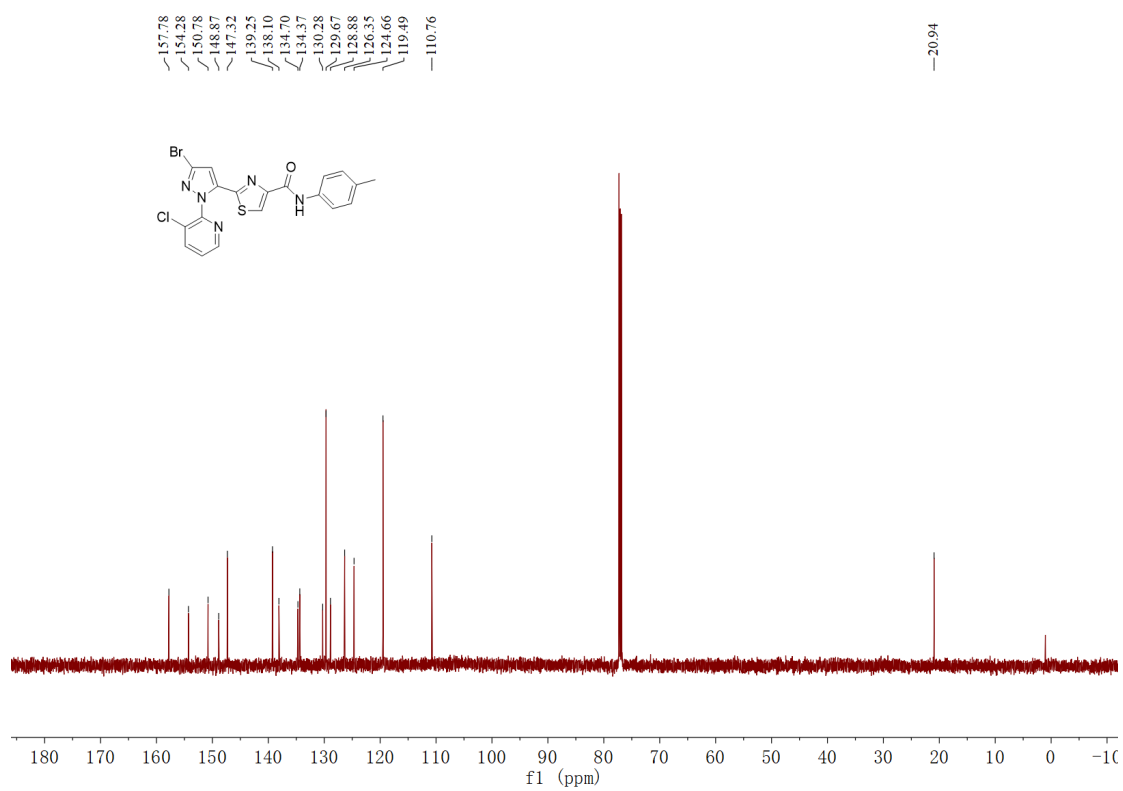

**Figure S44.** <sup>13</sup>C NMR spectrum of Compound 7k

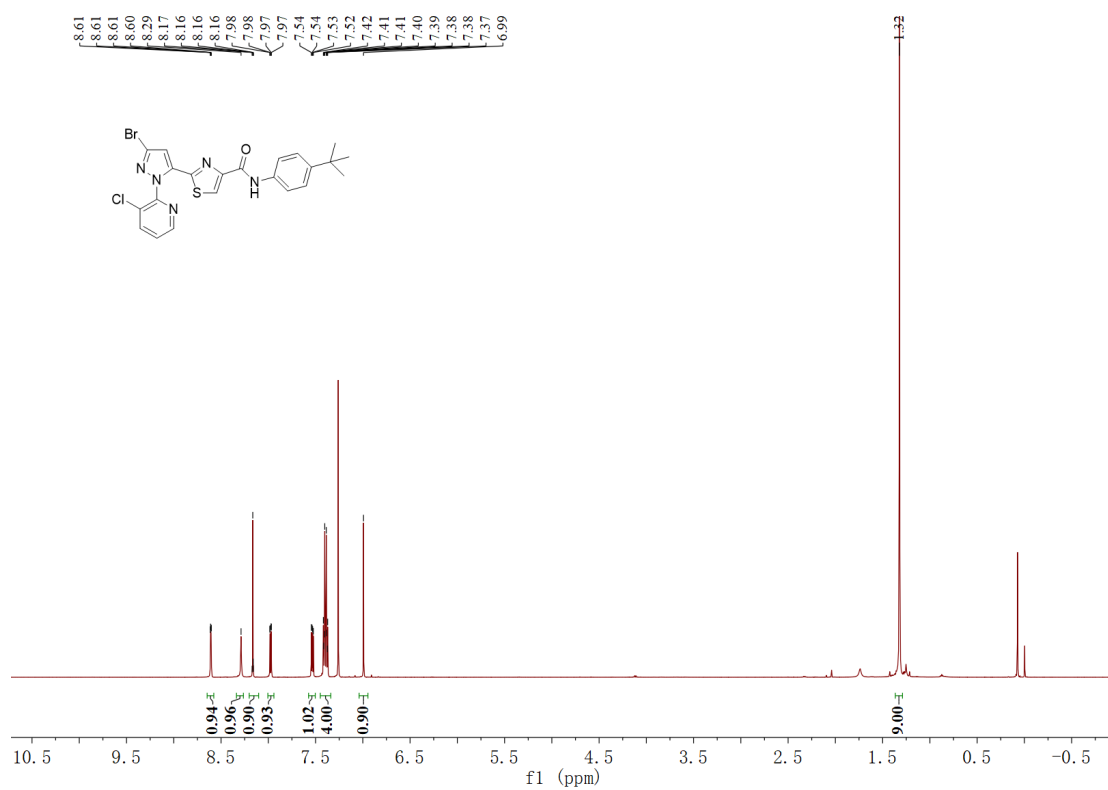

**Figure S45.** <sup>1</sup>H NMR spectrum of Compound **71**

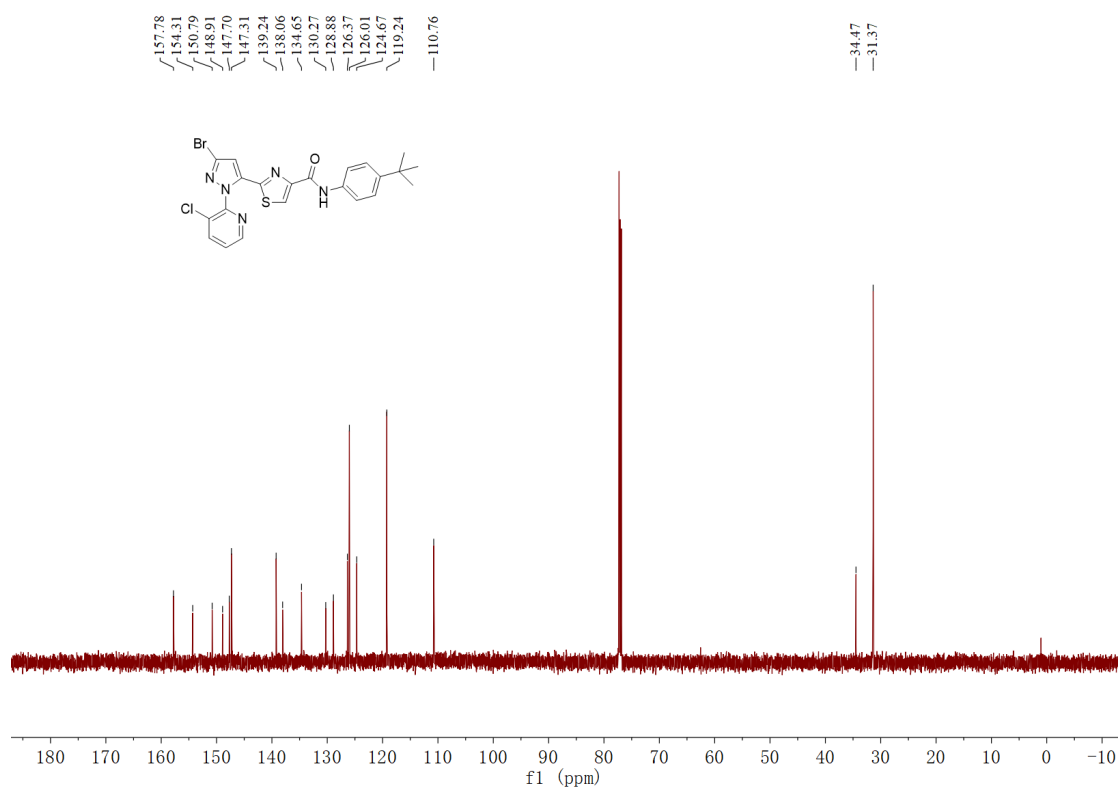

**Figure S46.** <sup>13</sup>C NMR spectrum of Compound **71**

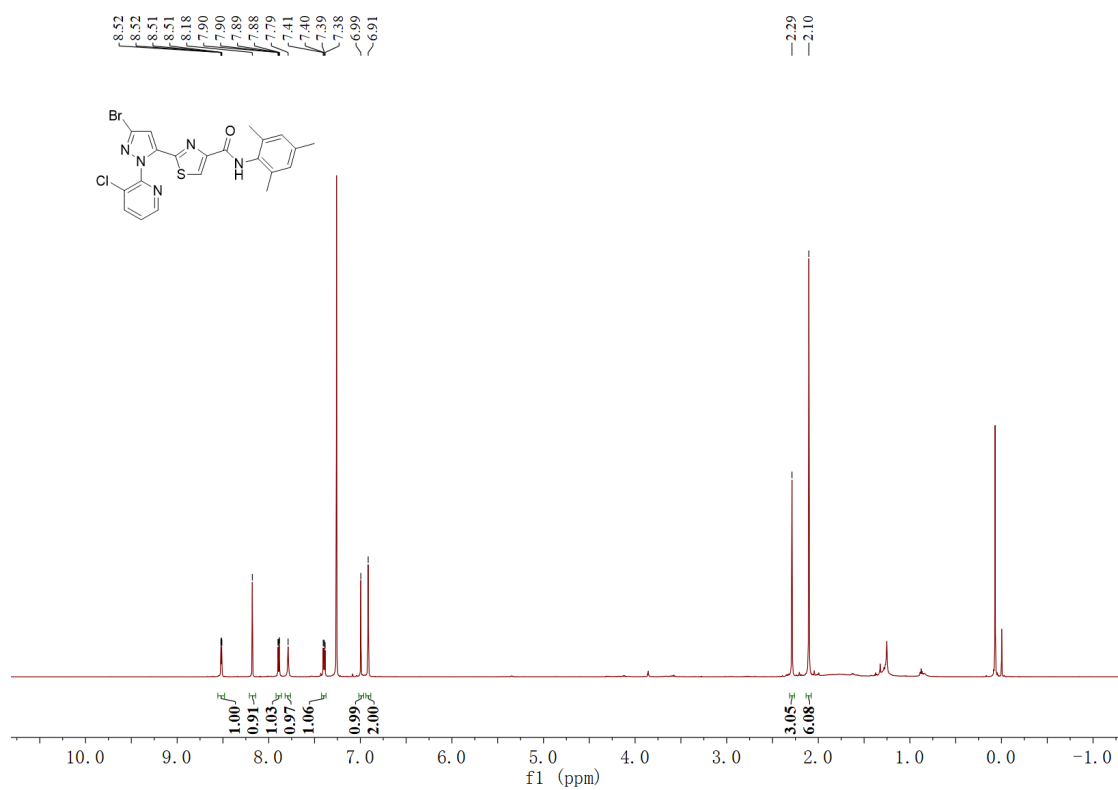

**Figure S547.** <sup>1</sup>H NMR spectrum of Compound **7m**

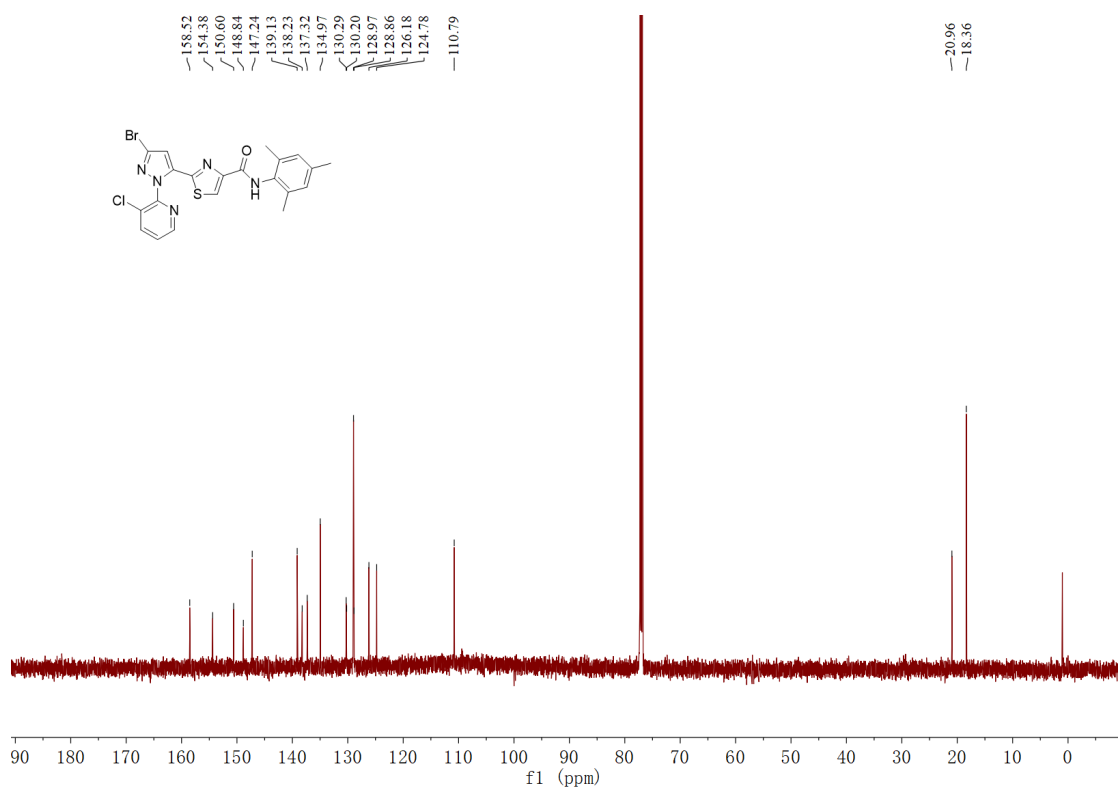

**Figure S48.** <sup>13</sup>C NMR spectrum of Compound **7m**

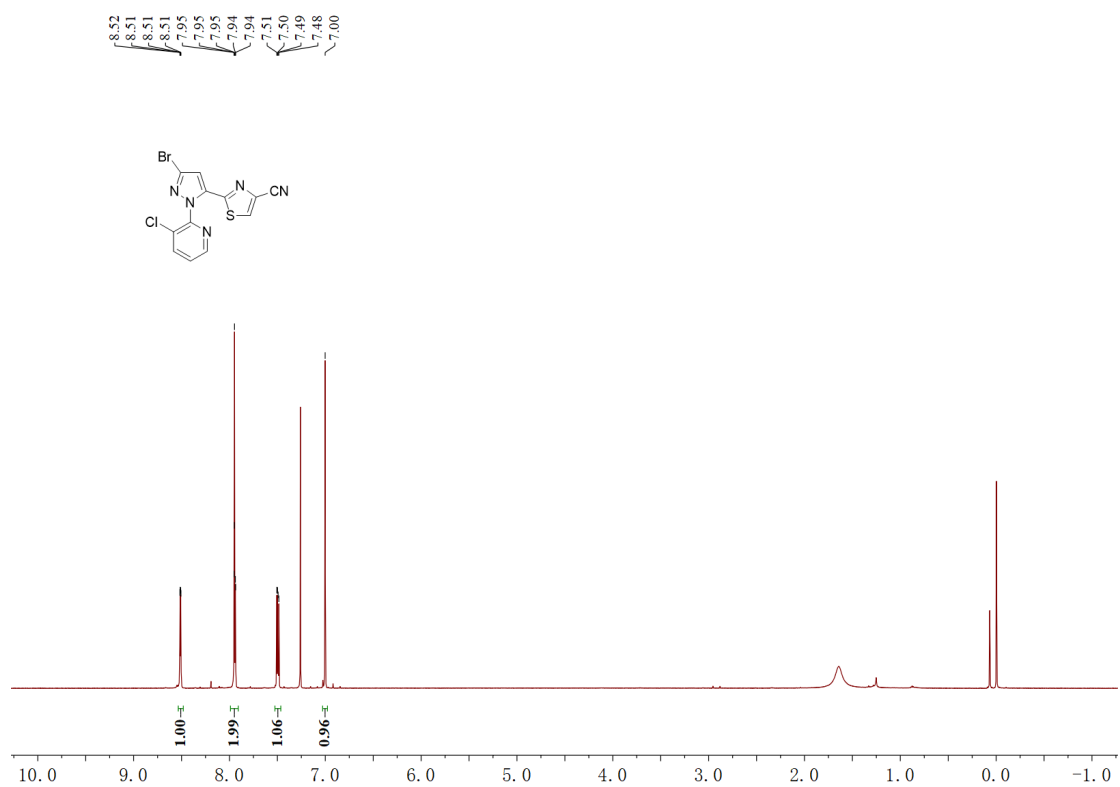

Figure S49. <sup>1</sup>H NMR spectrum of Compound 8

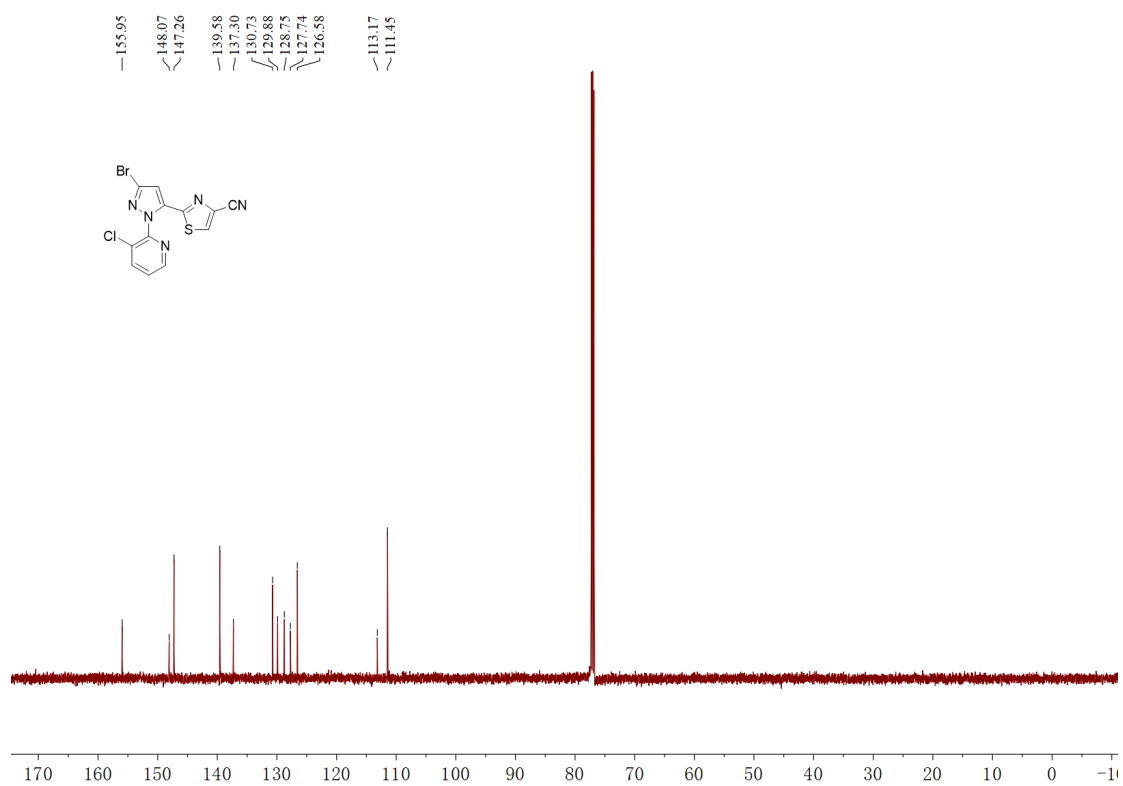

Figure S50. <sup>13</sup>C NMR spectrum of Compound 8
